# Supplementary material for: Rehabilitation time has greater influences on soil mechanical composition and erodibility than does rehabilitation land type in the hilly-gully region of the Loess Plateau, China
Source: PeerJ. 2019 Nov 21;7:e8090. doi: 10.7717/peerj.8090 (PMC6875390; doi:10.7717/peerj.8090)
Supplement: Data S1 [file peerj-07-8090-s001.xlsx]

## Sheet: Sheet1
Type	Time	Soil layer	<0.002	0.002-0.005	0.005-0.01	0.01-0.02	0.02-0.05	0.05-0.1	0.1-0.2	0.2-0.25	0.25-0.5	0.5-2	K	<0.002	0.002-0.005	0.005-0.01	0.01-0.02	0.02-0.05	0.05-0.1	0.1-0.2	0.2-0.25	0.25-0.5	0.5-2	PD	<0.002	0.002-0.005	0.005-0.01	0.01-0.02	0.02-0.05	0.05-0.1	0.1-0.2	0.2-0.25	0.25-0.5	0.5-2	MD	TOCg/kg	BD	TNg/kg
CL	0	1	15.4078	4.077	5.90726	15.7466	35.852	19.0944	3.91499	0	0	0	0.408824	15.4078	4.077	5.90726	15.7466	35.852	19.0944	3.91499	0	0	0	2.69719	9.99704	2.90899	4.43722	14.0886	39.074	22.0521	5.11016	0.223245	2.09244	0.016223	2.60642	3.16	1.23725	0.426093
CL	0	2	13.5429	3.51658	5.05738	14.2826	38.1325	21.7866	3.68149	0	0	0	0.406135	13.5429	3.51658	5.05738	14.2826	38.1325	21.7866	3.68149	0	0	0	2.67175	9.96268	2.84983	4.27297	13.7288	41.1701	23.9064	4.10931	0	0	0	2.60288	2.45	1.29325	0.332893
CL	0	3	13.3284	3.40638	4.8807	14.0684	38.7116	22.1363	3.4682	0	0	0	0.406777	13.3284	3.40638	4.8807	14.0684	38.7116	22.1363	3.4682	0	0	0	2.66812	9.06371	2.5954	3.89915	13.0793	41.8967	25.0314	4.4343	0	0	0	2.58467	1.85	1.31615	0.257977
CL	0	4	13.2144	3.35073	4.83383	14.22	39.1238	21.9696	3.28763	0	0	0	0.408696	13.2144	3.35073	4.83383	14.22	39.1238	21.9696	3.28763	0	0	0	2.66647	10.454	2.99519	4.64156	15.2193	41.0366	22.1865	3.46688	0	0	0	2.61347	1.6	1.30825	0.245705
CL	0	5	13.74	3.5398	5.18575	15.2162	38.5816	20.6547	3.08203	0	0	0	0.412875	13.74	3.5398	5.18575	15.2162	38.5816	20.6547	3.08203	0	0	0	2.67496	9.64259	2.81152	4.57427	16.9317	43.3006	20.3468	2.39263	0	0	0	2.60075	1.59	1.34765	0.256733
CL	0	1	17.8205	4.79439	7.2585	19.8546	35.309	13.8073	1.15572	0	0	0	0.429404	17.8205	4.79439	7.2585	19.8546	35.309	13.8073	1.15572	0	0	0	2.72711	9.59249	2.8724	4.66208	16.0423	39.4971	20.1654	4.79758	0.264537	2.02134	0.084776	2.60197	4.13	1.10265	0.548396
CL	0	2	18.9111	5.00769	7.53231	20.1917	34.4817	13.011	0.864552	0	0	0	0.430517	18.9111	5.00769	7.53231	20.1917	34.4817	13.011	0.864552	0	0	0	2.73766	9.56122	2.75297	4.32018	14.3977	38.9772	22.0861	5.52428	0.226046	2.02918	0.125094	2.59842	3.83	1.21495	0.536836
CL	0	3	18.0363	4.82365	7.29465	19.7871	35.2176	13.8118	1.02891	0	0	0	0.430607	18.0363	4.82365	7.29465	19.7871	35.2176	13.8118	1.02891	0	0	0	2.72909	8.94194	2.61834	4.11922	14.1834	41.2896	23.8204	5.02708	0	0	0	2.58444	3.22	1.3458	0.41976
CL	0	4	19.4008	4.67827	6.66233	17.1811	34.4903	15.2941	2.29309	0	0	0	0.417184	19.4008	4.67827	6.66233	17.1811	34.4903	15.2941	2.29309	0	0	0	2.73762	8.93184	2.58753	4.14006	14.8025	41.6936	23.1133	4.73115	0	0	0	2.58457	2.87	1.3457	0.377473
CL	0	5	15.7299	4.02779	5.90342	16.3608	36.962	18.4203	2.59571	0	0	0	0.416577	15.7299	4.02779	5.90342	16.3608	36.962	18.4203	2.59571	0	0	0	2.70038	8.50258	2.56818	4.23719	15.3172	42.1901	23.0114	4.17348	0	0	0	2.57755	1.92	1.33775	0.306005
CL	0	1	16.3334	4.27206	6.35774	18.1015	37.1119	16.1126	1.71081	0	0	0	0.424598	16.3334	4.27206	6.35774	18.1015	37.1119	16.1126	1.71081	0	0	0	2.70908	9.17887	2.63542	4.17218	15.0804	40.3275	20.7143	4.76351	0.357351	2.56079	0.209753	2.59187	3.67	1.2787	0.430407
CL	0	2	18.3038	4.58582	6.63282	18.1153	35.6989	15.1771	1.48633	0	0	0	0.42307	18.3038	4.58582	6.63282	18.1153	35.6989	15.1771	1.48633	0	0	0	2.7285	9.70499	2.77216	4.30944	15.3737	42.1965	21.6209	4.02236	0	0	0	2.59968	3.51	1.28585	0.414732
CL	0	3	17.7896	4.4669	6.42669	17.5873	36.1711	15.9264	1.63192	0	0	0	0.422619	17.7896	4.4669	6.42669	17.5873	36.1711	15.9264	1.63192	0	0	0	2.72296	9.41983	2.72066	4.28084	15.0839	42.2581	22.7473	3.48942	0	0	0	2.59432	2.41	1.30085	0.30705
CL	0	4	16.4107	4.2718	6.31797	17.9257	37.2739	16.1956	1.60432	0	0	0	0.426334	16.4107	4.2718	6.31797	17.9257	37.2739	16.1956	1.60432	0	0	0	2.70963	9.11311	2.63715	4.29882	16.4511	44.4122	20.9678	2.11981	0	0	0	2.58962	1.89	1.28925	0.272557
CL	0	5	16.3188	4.16847	6.17557	18.1727	37.7409	15.9822	1.44143	0	0	0	0.428058	16.3188	4.16847	6.17557	18.1727	37.7409	15.9822	1.44143	0	0	0	2.70816	10.1442	2.88357	4.73752	17.5881	43.2908	19.4462	1.90957	0	0	0	2.60993	1.73	1.28405	0.184424
SL	36	1	11.113	2.99147	4.17794	11.6581	36.0388	23.5599	6.68692	0.306139	3.00781	0.459912	0.317459	11.113	2.99147	4.17794	11.6581	36.0388	23.5599	6.68692	0.306139	3.00781	0.459912	2.63727	4.2487	1.32059	1.94045	6.79595	33.1226	28.1225	12.937	1.83052	6.79524	2.88647	2.44851	13.84	1.09155	1.33461
SL	36	2	12.1641	3.23041	4.5797	12.955	38.587	23.6068	4.87705	0	0	0	0.39644	12.1641	3.23041	4.5797	12.955	38.587	23.6068	4.87705	0	0	0	2.65167	4.88893	1.50885	2.26753	8.35803	39.2441	30.4159	9.82545	0.433884	2.75582	0.301472	2.46959	4.31	1.20195	0.53775
SL	36	3	11.7958	3.16663	4.56373	13.1476	38.7224	23.5982	5.00563	0	0	0	0.397453	11.7958	3.16663	4.56373	13.1476	38.7224	23.5982	5.00563	0	0	0	2.64669	5.10845	1.53119	2.32163	8.67835	38.7959	29.9733	10.3094	0.444776	2.2019	0.635112	2.4774	4.2	1.22345	0.485238
SL	36	4	11.6591	2.96202	4.21077	12.4203	39.5806	24.812	4.35521	0	0	0	0.39772	11.6591	2.96202	4.21077	12.4203	39.5806	24.812	4.35521	0	0	0	2.64209	6.4184	1.88666	2.84681	10.4967	42.0045	28.3468	6.91578	0.132748	0.943551	0.007977	2.51942	2.59	1.25765	0.295522
SL	36	5	10.8	2.93549	4.40193	13.6844	40.478	23.8388	3.86147	0	0	0	0.407239	10.8	2.93549	4.40193	13.6844	40.478	23.8388	3.86147	0	0	0	2.63167	5.42048	1.6132	2.53209	10.6318	44.1255	29.2944	6.38256	0	0	0	2.48815	1.86	1.2425	0.22609
SL	36	1	12.8308	3.30922	4.60522	12.8396	38.047	23.3461	5.02215	0	0	0	0.391434	12.8308	3.30922	4.60522	12.8396	38.047	23.3461	5.02215	0	0	0	2.66033	5.9533	1.75604	2.60716	9.43763	39.4088	28.5559	9.28738	0.58293	2.39429	0.016553	2.50555	5.64	1.0327	0.67591
SL	36	2	12.4077	3.2355	4.58682	13.1326	39.0511	23.5207	4.06557	0	0	0	0.40018	12.4077	3.2355	4.58682	13.1326	39.0511	23.5207	4.06557	0	0	0	2.65482	6.17642	1.81029	2.73367	9.98955	40.0558	28.3551	8.49516	0.301919	1.98019	0.101895	2.51268	3.71	1.12235	0.436825
SL	36	3	11.6441	3.05909	4.45934	13.4207	39.8908	23.7025	3.82347	0	0	0	0.404334	11.6441	3.05909	4.45934	13.4207	39.8908	23.7025	3.82347	0	0	0	2.64388	5.51852	1.66453	2.61347	10.2783	42.4723	29.6341	7.8188	0	0	0	2.49163	2.66	1.222	0.338971
SL	36	4	10.9936	2.99094	4.57017	14.6285	40.6473	22.5386	3.63086	0	0	0	0.412394	10.9936	2.99094	4.57017	14.6285	40.6473	22.5386	3.63086	0	0	0	2.63588	5.83256	1.73468	2.79626	11.6594	44.0412	28.0619	5.874	0	0	0	2.50322	2.14	1.30615	0.248575
SL	36	5	11.6372	3.20178	4.97562	15.6845	40.0657	21.2663	3.16894	0	0	0	0.417012	11.6372	3.20178	4.97562	15.6845	40.0657	21.2663	3.16894	0	0	0	2.64754	6.12916	1.82554	3.03213	13	44.6691	26.6157	4.72842	0	0	0	2.51419	1.97	1.32085	0.24329
WL	10	1	12.7545	3.42516	4.88846	13.3516	37.5754	22.9202	5.08467	0	0	0	0.397317	12.7545	3.42516	4.88846	13.3516	37.5754	22.9202	5.08467	0	0	0	2.66112	7.62392	2.27	3.3784	11.0868	40.1919	27.0889	7.21055	0.084782	0.979672	0.085167	2.55268	3.68	1.2631	0.392745
WL	10	2	12.172	3.31972	4.94449	14.5731	38.7926	21.9676	4.23047	0	0	0	0.407789	12.172	3.31972	4.94449	14.5731	38.7926	21.9676	4.23047	0	0	0	2.6543	6.21566	1.87353	2.92993	11.2162	43.0245	28.3235	6.41676	0	0	0	2.51469	2.64	1.29445	0.345029
WL	10	3	11.0553	3.03986	4.60468	14.0989	40.0051	23.38	3.81613	0	0	0	0.408254	11.0553	3.03986	4.60468	14.0989	40.0051	23.38	3.81613	0	0	0	2.63674	5.47772	1.62447	2.57471	10.9153	44.2269	29.0143	6.16659	0	0	0	2.49042	1.99	1.31665	0.202228
WL	10	4	11.671	2.99656	4.31472	12.778	39.631	24.3807	4.22798	0	0	0	0.400596	11.671	2.99656	4.31472	12.778	39.631	24.3807	4.22798	0	0	0	2.64301	6.25772	1.83695	2.91745	12.0845	44.9214	27.423	4.55898	0	0	0	2.51603	1.71	1.2909	0.17979
WL	10	5	11.9701	3.22702	4.77962	13.8818	39.0533	23.1852	3.90302	0	0	0	0.405699	11.9701	3.22702	4.77962	13.8818	39.0533	23.1852	3.90302	0	0	0	2.65026	6.01124	1.81733	2.98371	12.6368	45.2193	26.9664	4.36516	0	0	0	2.51055	1.65	1.31765	0.169915
WL	10	1	8.14841	2.13429	3.05786	8.77719	37.2109	32.5339	8.13746	0	0	0	0.358133	8.14841	2.13429	3.05786	8.77719	37.2109	32.5339	8.13746	0	0	0	2.57412	7.99611	2.41308	3.76681	13.2613	39.672	22.7999	6.18524	0.652244	3.10397	0.149372	2.56664	5.51	0.86995	0.609388
WL	10	2	14.5446	4.16195	6.43676	18.5514	37.7366	16.4132	2.15543	0	0	0	0.427033	14.5446	4.16195	6.43676	18.5514	37.7366	16.4132	2.15543	0	0	0	2.69134	7.49499	2.31054	3.85831	14.6599	42.0921	22.8062	4.93139	0.181298	1.64772	0.017577	2.55581	3.9	1.04295	0.431973
WL	10	3	14.952	4.26809	6.60411	18.8913	37.7388	16.045	1.50069	0	0	0	0.430604	14.952	4.26809	6.60411	18.8913	37.7388	16.045	1.50069	0	0	0	2.69646	6.25514	1.99625	3.49939	14.3193	42.1497	23.6036	5.97257	0.287141	1.84563	0.07123	2.52415	3.02	1.1949	0.366747
WL	10	4	14.8626	4.27168	6.61569	18.807	37.8098	16.1702	1.46301	0	0	0	0.430949	14.8626	4.27168	6.61569	18.807	37.8098	16.1702	1.46301	0	0	0	2.69555	6.24141	1.99852	3.48244	14.5946	43.9518	23.6913	5.02467	0.099768	0.901912	0.013607	2.52308	2.67	1.17985	0.328155
WL	10	5	16.7033	4.55938	6.6741	17.7064	36.6652	16.1923	1.49934	0	0	0	0.425595	16.7033	4.55938	6.6741	17.7064	36.6652	16.1923	1.49934	0	0	0	2.71412	7.43879	2.43092	4.068	15.0485	43.82	22.9486	4.2452	0	0	0	2.55545	2.21	1.255	0.311202
WL	10	1	12.6322	3.42422	5.01004	14.69	38.7458	21.4847	4.01314	0	0	0	0.40669	12.6322	3.42422	5.01004	14.69	38.7458	21.4847	4.01314	0	0	0	2.66078	6.4068	1.92963	2.99361	11.4508	41.0177	26.1712	7.12772	0.357766	2.41312	0.13164	2.52272	4.31	1.22125	0.544335
WL	10	2	12.2033	3.42532	5.2989	16.2871	39.4699	20.1898	3.12569	0	0	0	0.418537	12.2033	3.42532	5.2989	16.2871	39.4699	20.1898	3.12569	0	0	0	2.65722	5.78313	1.75908	2.87126	11.9258	42.3862	26.5359	6.88727	0.212079	1.6305	0.008767	2.50431	2.91	1.18485	0.369939
WL	10	3	12.1722	3.54579	5.68726	17.8843	39.5772	18.5877	2.54555	0	0	0	0.427142	12.1722	3.54579	5.68726	17.8843	39.5772	18.5877	2.54555	0	0	0	2.6594	5.87146	1.82944	3.0808	12.7426	43.4438	26.9884	6.04357	0	0	0	2.5078	2.45	1.25855	0.36692
WL	10	4	13.0489	3.74452	5.82912	17.6075	39.2185	18.334	2.21746	0	0	0	0.426103	13.0489	3.74452	5.82912	17.6075	39.2185	18.334	2.21746	0	0	0	2.67105	6.68757	2.11004	3.59021	14.5472	44.036	24.1326	4.89637	0	0	0	2.53423	2.8	1.2775	0.31569
WL	10	5	14.7692	3.95295	5.83741	17.0193	38.3274	17.8228	2.27093	0	0	0	0.422799	14.7692	3.95295	5.83741	17.0193	38.3274	17.8228	2.27093	0	0	0	2.69059	8.21014	2.53407	4.26399	16.7076	44.3487	21.198	2.73761	0	0	0	2.57305	2.29	1.239	0.280365
SL	5	1	13.5779	3.57458	5.05586	12.7743	35.2368	22.6176	6.00936	0.17683	0.884638	0.092048	0.384732	13.5779	3.57458	5.05586	12.7743	35.2368	22.6176	6.00936	0.17683	0.884638	0.092048	2.67243	5.65487	1.76366	2.67783	8.67982	36.4725	29.8419	11.3808	0.783512	2.68616	0.058938	2.49766	4.99	1.1505	0.596755
SL	5	2	13.4452	3.6718	5.34972	13.7041	36.0027	22.4947	5.33174	0	0	0	0.39462	13.4452	3.6718	5.34972	13.7041	36.0027	22.4947	5.33174	0	0	0	2.67187	4.95849	1.57578	2.4833	8.68314	37.91	30.7577	10.8529	0.46961	2.16962	0.139459	2.47374	4.3	1.3178	0.524264
SL	5	3	13.7725	3.62405	5.2516	13.5808	35.9073	22.8076	5.05613	0	0	0	0.395274	13.7725	3.62405	5.2516	13.5808	35.9073	22.8076	5.05613	0	0	0	2.67496	6.44455	2.00782	3.19565	10.6205	38.6541	28.6103	8.99163	0.210952	1.25162	0.012917	2.52342	2.88	1.11835	0.360259
SL	5	4	13.9641	3.59403	5.17615	13.4679	36.0337	22.9183	4.84588	0	0	0	0.395584	13.9641	3.59403	5.17615	13.4679	36.0337	22.9183	4.84588	0	0	0	2.67666	6.73455	2.06975	3.27079	10.8479	39.2442	29.1539	8.66324	0.015642	0	0	2.53023	2.22	1.1681	0.257678
SL	5	5	13.7104	3.46723	4.88114	12.6735	36.3251	23.7949	5.14775	0	0	0	0.391874	13.7104	3.46723	4.88114	12.6735	36.3251	23.7949	5.14775	0	0	0	2.67196	6.53089	1.99364	3.08451	10.5598	40.5714	29.2003	8.05955	0	0	0	2.52363	1.85		0.228412
SL	5	1	12.1525	3.22459	4.59648	12.8228	37.9442	23.8079	5.45154	0	0	0	0.391812	12.1525	3.22459	4.59648	12.8228	37.9442	23.8079	5.45154	0	0	0	2.65147	6.12524	1.84909	2.8225	10.5179	39.9923	26.9982	7.55451	0.34985	3.18351	0.60694	2.5144	5.04	1.30085	0.559667
SL	5	2	13.3071	3.43716	4.79395	12.7459	37.5308	23.6492	4.53589	0	0	0	0.395171	13.3071	3.43716	4.79395	12.7459	37.5308	23.6492	4.53589	0	0	0	2.66699	5.65561	1.74795	2.68272	10.2444	43.1787	29.8169	6.67373	0	0	0	2.4966	3.27	1.3218	0.363513
SL	5	3	12.0924	3.38136	5.15984	14.9388	38.3075	21.822	4.29811	0	0	0	0.408798	12.0924	3.38136	5.15984	14.9388	38.3075	21.822	4.29811	0	0	0	2.65443	6.81297	2.10288	3.36514	12.1638	42.0583	27.2762	6.22067	0	0	0	2.53389	2.13	1.19995	0.249549
SL	5	4	12.1759	3.46465	5.35048	15.7817	38.9278	20.9569	3.34262	0	0	0	0.415796	12.1759	3.46465	5.35048	15.7817	38.9278	20.9569	3.34262	0	0	0	2.6569	7.2975	2.27312	3.67323	13.3091	42.5485	25.7438	5.15473	0	0	0	2.54818	1.85	1.30255	0.235593
SL	5	5	13.1555	3.49281	5.16776	14.8718	38.5759	21.4212	3.315	0	0	0	0.410594	13.1555	3.49281	5.16776	14.8718	38.5759	21.4212	3.315	0	0	0	2.66778	7.93399	2.47001	4.01384	14.3694	42.8328	24.3236	4.05641	0	0	0	2.56469	2.13	1.33835	0.206217
SL	5	1	14.2632	3.63549	4.97453	12.6333	35.7186	23.1563	5.61864	0	0	0	0.386568	14.2632	3.63549	4.97453	12.6333	35.7186	23.1563	5.61864	0	0	0	2.67923	8.24752	2.37335	3.39421	10.1149	37.1339	27.3265	8.637	0.426962	2.3296	0.016142	2.56604	4.94	1.27795	0.50032
SL	5	2	14.0828	3.68152	5.14909	13.2915	36.1017	22.4772	5.21621	0	0	0	0.393262	14.0828	3.68152	5.14909	13.2915	36.1017	22.4772	5.21621	0	0	0	2.67831	7.54866	2.19859	3.18507	9.77086	38.1399	28.7202	8.70562	0.149791	1.36098	0.220348	2.54895	4.11	1.1794	0.448942
SL	5	3	14.107	3.622	5.13014	13.4745	36.0951	22.5097	5.06165	0	0	0	0.395499	14.107	3.622	5.13014	13.4745	36.0951	22.5097	5.06165	0	0	0	2.67832	7.70733	2.25684	3.35759	10.7018	39.5969	28.5094	7.8701	0	0	0	2.5529	2.67	1.4293	0.32461
SL	5	4	12.8554	3.54725	5.31934	14.8663	37.5775	21.5791	4.2551	0	0	0	0.407439	12.8554	3.54725	5.31934	14.8663	37.5775	21.5791	4.2551	0	0	0	2.66498	5.92471	1.81783	2.85876	10.6195	42.0096	29.5426	7.22315	0.003946	0	0	2.50581	1.93	1.3936	0.18456
SL	5	5	11.6771	3.22276	4.77842	13.6053	38.3507	23.677	4.68869	0	0	0	0.401612	11.6771	3.22276	4.77842	13.6053	38.3507	23.677	4.68869	0	0	0	2.64632	5.71434	1.79688	2.84635	10.4507	41.8912	30.0594	7.24114	0	0	0	2.49981	1.62	1.32375	0.178273
SL	10	1	12.2648	3.33771	4.79359	12.9283	37.1651	23.8877	5.62278	0	0	0	0.391436	12.2648	3.33771	4.79359	12.9283	37.1651	23.8877	5.62278	0	0	0	2.65412	6.70761	2.00862	2.93653	9.68538	38.3378	27.9625	8.71895	0.407934	2.79074	0.443975	2.52923	4.56	1.2368	0.464092
SL	10	2	12.1883	3.37617	5.06962	14.7106	38.2514	22.0022	4.40175	0	0	0	0.406409	12.1883	3.37617	5.06962	14.7106	38.2514	22.0022	4.40175	0	0	0	2.65524	6.64226	2.01146	2.98087	10.011	40.741	29.6925	7.92091	0	0	0	2.52535	3.13	1.2205	0.32242
SL	10	3	13.4149	3.48955	4.94072	13.0264	36.8679	23.5343	4.72626	0	0	0	0.394929	13.4149	3.48955	4.94072	13.0264	36.8679	23.5343	4.72626	0	0	0	2.66907	6.97351	2.19918	3.54661	11.8408	39.0354	27.1229	8.06643	0.128226	0.988005	0.098865	2.53986	2.86	1.19455	0.328791
SL	10	4	11.6627	2.90825	4.06012	11.4149	38.8893	26.0035	5.06122	0	0	0	0.390353	11.6627	2.90825	4.06012	11.4149	38.8893	26.0035	5.06122	0	0	0	2.64064	5.79871	1.71645	2.71	12.3144	46.4472	26.8409	4.17233	0	0	0	2.50232	2	1.27245	0.240914
SL	10	5	12.0349	3.04555	4.30335	12.4159	39.4162	24.5574	4.22674	0	0	0	0.398656	12.0349	3.04555	4.30335	12.4159	39.4162	24.5574	4.22674	0	0	0	2.64773	7.36422	2.22866	3.49444	12.3932	42.861	26.8814	4.7771	0	0	0	2.54758	1.59	1.298	0.195234
SL	10	1	12.9007	3.31377	4.5728	11.9446	35.9565	23.9475	6.46713	0.15718	0.739827	8.3e-05	0.378799	12.9007	3.31377	4.5728	11.9446	35.9565	23.9475	6.46713	0.15718	0.739827	8.3e-05	2.66115	8.40971	2.33278	3.2996	9.86982	36.8109	26.9777	8.20415	0.292562	2.80831	0.994549	2.56966	5.76	1.08465	0.619493
SL	10	2	13.2863	3.31733	4.55597	11.7975	36.2169	24.607	6.21893	0	0	0	0.384167	13.2863	3.31733	4.55597	11.7975	36.2169	24.607	6.21893	0	0	0	2.66497	7.54649	2.24807	3.24386	10.2229	40.7096	29.0308	6.99835	0	0	0	2.54857	3.39	1.3027	0.37038
SL	10	3	13.4557	3.27061	4.5175	12.1729	36.8356	24.0485	5.69917	0	0	0	0.389374	13.4557	3.27061	4.5175	12.1729	36.8356	24.0485	5.69917	0	0	0	2.66683	8.39605	2.39345	3.4525	10.6287	40.07	28.2829	6.77637	0	0	0	2.56756	1.95	1.37795	0.223036
SL	10	4	12.537	3.1793	4.49307	12.435	38.0544	24.4802	4.82102	0	0	0	0.394653	12.537	3.1793	4.49307	12.435	38.0544	24.4802	4.82102	0	0	0	2.65538												1.74	1.42045	0.201219
SL	10	5	12.2553	3.24266	4.73413	13.6425	38.3938	23.37	4.36163	0	0	0	0.402169	12.2553	3.24266	4.73413	13.6425	38.3938	23.37	4.36163	0	0	0	2.6537	7.19843	2.18792	3.45787	12.1934	41.7559	27.2798	5.92666	0	0	0	2.54347	1.55	1.37595	0.144287
SL	20	1	10.4915	2.85304	4.028	10.4569	34.688	26.0756	8.2037	0.217495	2.61997	0.365701	0.35026	10.4915	2.85304	4.028	10.4569	34.688	26.0756	8.2037	0.217495	2.61997	0.365701	2.62574	5.90074	1.80528	2.63204	8.17225	36.3051	29.5012	10.5879	0.665351	3.40656	1.02357	2.50549	8.43	1.1334	0.745144
SL	20	2	11.1917	2.86514	3.99145	10.6621	37.3067	27.0718	6.9111	0	0	0	0.379513	11.1917	2.86514	3.99145	10.6621	37.3067	27.0718	6.9111	0	0	0	2.63331	6.96915	2.06105	2.99892	9.55221	39.9584	30.1116	8.33761	0.011071	0	0	2.53285	2.47	1.19045	0.3221
SL	20	3	11.3104	2.75473	3.80503	9.96853	36.817	28.2181	7.1262	0	0	0	0.373803	11.3104	2.75473	3.80503	9.96853	36.817	28.2181	7.1262	0	0	0	2.63308	7.19337	2.11577	3.05947	9.41347	40.0705	30.3703	7.77702	0	0	0	2.53833	1.71	1.26605	0.190591
SL	20	4	11.6184	2.87131	4.00959	10.8046	37.2838	26.9976	6.41462	0	0	0	0.381004	11.6184	2.87131	4.00959	10.8046	37.2838	26.9976	6.41462	0	0	0	2.63926	6.54011	1.92059	2.89441	10.0805	41.6325	29.9765	6.95546	0	0	0	2.5216	1.42	1.331	0.177737
SL	20	5	11.6984	2.92877	4.12771	11.1788	37.3363	26.6082	6.12185	0	0	0	0.383592	11.6984	2.92877	4.12771	11.1788	37.3363	26.6082	6.12185	0	0	0	2.64129	7.17778	2.17769	3.35971	11.109	40.7916	28.7542	6.63011	0	0	0	2.54151	1.41	1.38395	0.176955
SL	10	1	12.4802	3.40032	4.77638	12.4794	36.8707	24.4096	5.5834	0	0	0	0.379408	12.4802	3.40032	4.77638	12.4794	36.8707	24.4096	5.5834	0	0	0	2.65676	7.13777	2.14035	3.12806	9.98282	37.9627	27.6375	8.63256	0.314607	2.33171	0.731934	2.54123	7.36	1.2547	0.698485
SL	10	2	13.0068	3.40244	4.73027	12.2718	36.5581	24.3216	5.709	0	0	0	0.388871	13.0068	3.40244	4.73027	12.2718	36.5581	24.3216	5.709	0	0	0	2.66287	7.18846	2.19216	3.22292	10.313	40.4531	29.0054	7.62274	0.002177	0	0	2.54063	3.06	1.37495	0.375543
SL	10	3	12.7611	3.25204	4.581	12.6724	38.1003	24.0551	4.57807	0	0	0	0.396538	12.7611	3.25204	4.581	12.6724	38.1003	24.0551	4.57807	0	0	0	2.65891	7.11866	2.1131	3.11547	10.2282	41.3204	29.6289	6.47521	0	0	0	2.5377	1.84	1.3913	0.234834
SL	10	4	11.6881	2.97401	4.1457	11.3662	37.9678	25.9886	5.86956	0	0	0	0.387131	11.6881	2.97401	4.1457	11.3662	37.9678	25.9886	5.86956	0	0	0	2.64165	5.16571	1.60332	2.36163	9.07894	43.9489	31.5285	6.31303	0	0	0	2.47782	1.71	1.40405	0.244264
SL	10	5	11.5623	3.05939	4.39588	12.3834	38.4549	25.084	5.06012	0	0	0	0.394799	11.5623	3.05939	4.39588	12.3834	38.4549	25.084	5.06012	0	0	0	2.64192	6.54779	2.03478	3.26943	12.0776	42.7915	27.7609	5.5179	0	0	0	2.52662	1.55	1.39705	0.212638
WL	5	1	12.7807	3.30835	4.55979	11.8046	36.6416	25.0498	5.85513	0	0	0	0.384252	12.7807	3.30835	4.55979	11.8046	36.6416	25.0498	5.85513	0	0	0	2.65887	7.71326	2.29112	3.37278	10.4061	38.8819	27.9915	7.8567	0.052805	1.26818	0.165704	2.5543	4.34	1.08535	0.499241
WL	5	2	13.017	3.31491	4.58096	12.0151	36.9442	24.7708	5.35707	0	0	0	0.388664	13.017	3.31491	4.58096	12.0151	36.9442	24.7708	5.35707	0	0	0	2.66191	6.94867	2.10007	3.11426	9.90008	40.6837	29.9335	7.31973	0	0	0	2.53357	2.83	1.11885	0.349553
WL	5	3	12.5865	3.12336	4.34039	11.6079	37.1468	25.5653	5.62975	0	0	0	0.386405	12.5865	3.12336	4.34039	11.6079	37.1468	25.5653	5.62975	0	0	0	2.65469	7.51752	2.21859	3.26463	10.1349	40.1103	29.4428	7.31129	0	0	0	2.5477	2.05	1.10915	0.273576
WL	5	4	12.7449	3.12863	4.35714	11.8256	37.4233	25.2057	5.31468	0	0	0	0.388937	12.7449	3.12863	4.35714	11.8256	37.4233	25.2057	5.31468	0	0	0	2.65686	8.63577	2.44523	3.57373	10.8864	39.8844	28.0627	6.51174	0	0	0	2.57302	1.58	1.3392	0.208756
WL	5	5	12.7677	3.13783	4.42014	11.8821	37.2934	25.1785	5.32022	0	0	0	0.388923	12.7677	3.13783	4.42014	11.8821	37.2934	25.1785	5.32022	0	0	0	2.65739	8.14368	2.26557	3.36786	11.1892	41.498	27.9162	5.61955	0	0	0	2.56184	1.62	1.33405	0.200926
WL	5	1	13.3966	3.38192	4.63992	12.0519	36.8486	24.4227	5.2584	0	0	0	0.38748	13.3966	3.38192	4.63992	12.0519	36.8486	24.4227	5.2584	0	0	0	2.66691	9.2865	2.567	3.63715	10.6856	37.8373	25.862	6.81388	0.080259	2.42492	0.805395	2.58835	4.13	1.17935	0.46189
WL	5	2	13.4352	3.4052	4.71346	12.4378	37.0076	23.9159	5.08483	0	0	0	0.392071	13.4352	3.4052	4.71346	12.4378	37.0076	23.9159	5.08483	0	0	0	2.66793	7.89158	2.32465	3.36766	10.2987	40.2277	28.7173	7.16908	0.003237	0	0	2.55675	2.58	1.3115	0.331705
WL	5	3	13.4626	3.37941	4.75084	12.9682	37.6184	23.4108	4.40976	0	0	0	0.397256	13.4626	3.37941	4.75084	12.9682	37.6184	23.4108	4.40976	0	0	0	2.66852	8.90076	2.57918	3.80877	11.9884	40.9899	26.4967	5.23632	0	0	0	2.58054	2.03	1.30485	0.26446
WL	5	4	13.1048	3.29629	4.64191	12.7794	38.024	23.7493	4.4044	0	0	0	0.397313	13.1048	3.29629	4.64191	12.7794	38.024	23.7493	4.4044	0	0	0	2.66349	8.27492	2.38385	3.53014	11.4998	41.5237	27.2612	5.52634	0	0	0	2.56625	1.79	1.24415	0.201869
WL	5	5	13.6187	3.5256	5.12804	14.4057	38.0569	21.7626	3.50251	0	0	0	0.407181	13.6187	3.5256	5.12804	14.4057	38.0569	21.7626	3.50251	0	0	0	2.67287	7.80861	2.31814	3.68148	13.3759	43.096	25.4896	4.23022	0	0	0	2.55891	1.77	1.2831	0.19037
NG	30	1	13.6021	3.67299	5.13562	12.6934	34.8997	23.0294	6.05584	0.052432	0.842101	0.016401	0.383822	13.6021	3.67299	5.13562	12.6934	34.8997	23.0294	6.05584	0.052432	0.842101	0.016401	2.67318	8.15841	2.42084	3.51441	10.4719	37.8627	26.8977	7.72794	0.169919	2.22069	0.555571	2.56599	4.96	1.08705	0.555834
NG	30	2	13.7022	3.5112	4.85789	12.2631	35.8478	24.3425	5.47525	0	0	0	0.386868	13.7022	3.5112	4.85789	12.2631	35.8478	24.3425	5.47525	0	0	0	2.67178	7.8402	2.32694	3.32371	9.82887	39.6063	29.4346	7.63943	0	0	0	2.55514	3.4	1.1993	0.396594
NG	30	3	13.3481	3.41159	4.72309	11.8546	35.6837	25.0627	5.91624	0	0	0	0.384314	13.3481	3.41159	4.72309	11.8546	35.6837	25.0627	5.91624	0	0	0	2.66659	8.01257	2.41784	3.58324	10.8411	39.7178	28.3615	7.06593	0	0	0	2.56124	2.36	1.1509	0.282416
NG	30	4	13.195	3.39142	4.78226	12.4778	36.5216	24.3963	5.23556	0	0	0	0.391042	13.195	3.39142	4.78226	12.4778	36.5216	24.3963	5.23556	0	0	0	2.66524	8.37836	2.47846	3.6877	11.5554	40.6617	27.5058	5.7326	0	0	0	2.56958	1.53	1.241	0.204188
NG	30	5	12.7463	3.1464	4.41964	11.8279	37.2089	25.4057	5.24517	0	0	0	0.388548	12.7463	3.1464	4.41964	11.8279	37.2089	25.4057	5.24517	0	0	0	2.65712	7.49796	2.21603	3.32467	11.1392	41.943	28.2846	5.59457	0	0	0	2.5484	1.26	1.376	0.173346
NG	15	1	12.5565	3.31202	4.60078	12.0505	36.212	24.5588	6.69638	0.013012	0	0	0.38205	12.5565	3.31202	4.60078	12.0505	36.212	24.5588	6.69638	0.013012	0	0	2.65654	7.6212	2.20479	3.16613	9.91727	37.7631	27.1469	8.04423	0.102924	2.45786	1.57557	2.5531	5.07	1.27415	0.565035
NG	15	2	12.9676	3.21859	4.42863	11.7705	36.855	24.9956	5.76407	0	0	0	0.386236	12.9676	3.21859	4.42863	11.7705	36.855	24.9956	5.76407	0	0	0	2.66025	7.70987	2.28234	3.32131	10.5729	40.5288	28.5881	6.99674	0	0	0	2.55285	2.8	1.2291	0.354121
NG	15	3	12.6146	3.21883	4.49418	12.3477	37.8127	24.4434	5.06862	0	0	0	0.393463	12.6146	3.21883	4.49418	12.3477	37.8127	24.4434	5.06862	0	0	0	2.65652	8.21761	2.41295	3.53138	11.1497	40.6728	27.712	6.30344	0	0	0	2.56516	1.81	1.32245	0.222934
NG	15	4	13.0229	3.23353	4.51636	12.4871	37.9717	24.1795	4.58888	0	0	0	0.395284	13.0229	3.23353	4.51636	12.4871	37.9717	24.1795	4.58888	0	0	0	2.66166	9.22718	2.57274	3.75562	11.1554	38.9471	27.5804	6.76157	0	0	0	2.58525	1.43	1.3236	0.215292
NG	15	5	12.9042	3.23332	4.55716	12.4787	37.6021	24.4214	4.80302	0	0	0	0.393449	12.9042	3.23332	4.55716	12.4787	37.6021	24.4214	4.80302	0	0	0	2.66033	7.65789	2.18633	3.28937	11.2486	41.8983	28.1482	5.57137	0	0	0	2.55134	2.06		0.190082
SL	5	1	14.5606	3.75002	5.14414	12.9439	35.7529	22.8846	4.9638	0	0	0	0.389726	14.5606	3.75002	5.14414	12.9439	35.7529	22.8846	4.9638	0	0	0	2.68354	8.77281	2.50691	3.61079	10.8861	36.6756	25.0076	7.49736	0.442837	3.48447	1.11561	2.58054	4.76	1.30435	0.558701
SL	5	2	15.4996	3.85767	5.25948	12.9679	35.1087	22.6015	4.70513	0	0	0	0.390804	15.4996	3.85767	5.25948	12.9679	35.1087	22.6015	4.70513	0	0	0	2.69403	8.57798	2.43602	3.52514	10.2917	38.16	28.8991	8.11012	0	0	0	2.57127	3.5	1.2706	0.431067
SL	5	3	15.2459	3.7114	5.07331	12.543	34.8445	23.3462	5.23575	0	0	0	0.387573	15.2459	3.7114	5.07331	12.543	34.8445	23.3462	5.23575	0	0	0	2.6901	8.69514	2.49995	3.68023	10.8023	38.4626	28.4376	7.42217	0	0	0	2.57488	2.34	1.22395	0.307635
SL	5	4	14.0936	3.48895	4.86134	12.5066	35.6984	23.9921	5.35896	0	0	0	0.388714	14.0936	3.48895	4.86134	12.5066	35.6984	23.9921	5.35896	0	0	0	2.6762	7.16867	2.06972	3.17156	11.2654	41.8032	28.4238	6.09768	0	0	0	2.53963	1.99	1.20505	0.24502
SL	5	5	12.6405	3.41298	4.92481	13.2982	37.2057	23.6585	4.85935	0	0	0	0.397541	12.6405	3.41298	4.92481	13.2982	37.2057	23.6585	4.85935	0	0	0	2.65967	6.91158	2.13224	3.42433	12.3578	42.1132	27.2063	5.85464	0	0	0	2.53676	1.67	1.31535	0.197462
NG	30	1	14.9978	3.93545	5.52052	14.3097	36.3205	20.5959	4.32015	0	0	0	0.395425	14.9978	3.93545	5.52052	14.3097	36.3205	20.5959	4.32015	0	0	0	2.69072	8.58284	2.53678	3.81491	12.9284	39.8409	23.4856	5.66528	0.217414	2.58511	0.342727	2.57802	6.34	1.12075	0.729711
NG	30	2	15.8515	4.23761	6.08483	15.7801	36.0254	18.8052	3.21525	0	0	0	0.409013	15.8515	4.23761	6.08483	15.7801	36.0254	18.8052	3.21525	0	0	0	2.70261	8.56348	2.54271	3.87819	12.6458	40.0099	24.9876	6.07474	0.071412	1.10425	0.121979	2.57621	4.54	1.19505	0.511098
NG	30	3	16.5164	4.28997	6.21644	16.2133	36.1397	18.1213	2.50289	0	0	0	0.414347	16.5164	4.28997	6.21644	16.2133	36.1397	18.1213	2.50289	0	0	0	2.70962	9.44932	2.82101	4.40753	14.6535	41.4153	23.1874	4.06601	0	0	0	2.59564	3.21	1.214	0.35481
NG	30	4	16.6203	4.30993	6.35164	16.9148	36.3007	17.1281	2.37451	0	0	0	0.419063	16.6203	4.30993	6.35164	16.9148	36.3007	17.1281	2.37451	0	0	0	2.71133	8.93819	2.64447	4.21896	14.4055	41.4605	23.9949	4.33749	0	0	0	2.585	2.41	1.30395	0.267971
NG	30	5	16.2511	4.37077	6.5807	17.7875	37.0569	16.4208	1.53219	0	0	0	0.426325	16.2511	4.37077	6.5807	17.7875	37.0569	16.4208	1.53219	0	0	0	2.70897	8.42731	2.71174	4.79747	17.4738	42.8812	20.8197	2.88873	0	0	0	2.58067	1.81	1.29855	0.201734
NG	11	1	12.0429	3.16625	4.33526	10.5174	34.4281	25.5918	7.23619	0.067102	2.07885	0.536197	0.362339	12.0429	3.16625	4.33526	10.5174	34.4281	25.5918	7.23619	0.067102	2.07885	0.536197	2.64953	7.87359	2.30698	3.30025	9.57842	36.2558	27.3244	8.95638	0.505958	3.05944	0.838752	2.55903	6.4	1.1585	0.639623
NG	11	2	13.944	3.48792	4.72998	11.8849	36.3519	24.2885	5.31276	0	0	0	0.386965	13.944	3.48792	4.72998	11.8849	36.3519	24.2885	5.31276	0	0	0	2.67382	8.9986	2.53851	3.58404	10.3398	38.7551	28.2941	7.48987	0	0	0	2.5798	3.35	1.16895	0.398538
NG	11	3	12.9589	3.18479	4.3732	11.1436	36.8608	25.9274	5.55128	0	0	0	0.383735	12.9589	3.18479	4.3732	11.1436	36.8608	25.9274	5.55128	0	0	0	2.6593	7.27455	2.136	3.0286	9.30964	40.56	30.4002	7.29103	0	0	0	2.53999	2.22	1.31845	0.285662
NG	11	4	12.3617	3.095	4.26575	11.2466	37.4762	25.9196	5.63516	0	0	0	0.385908	12.3617	3.095	4.26575	11.2466	37.4762	25.9196	5.63516	0	0	0	2.65126	7.58626	2.23864	3.3039	10.5302	40.8099	29.1059	6.42528	0	0	0	2.54977	1.75	1.3303	0.206619
NG	11	5	12.6863	3.16388	4.4222	11.9762	37.7688	24.9268	5.05573	0	0	0	0.391458	12.6863	3.16388	4.4222	11.9762	37.7688	24.9268	5.05573	0	0	0	2.65661	7.86325	2.27931	3.40972	11.401	41.5947	27.7919	5.66002	0	0	0	2.5569	1.45	1.3592	0.178429
WL	5	1	17.4584	4.44543	6.42329	16.8799	34.728	16.0113	2.79522	0.087772	1.01582	0.154836	0.412624	17.4584	4.44543	6.42329	16.8799	34.728	16.0113	2.79522	0.087772	1.01582	0.154836	2.72064	11.394	3.53141	5.61113	16.4241	35.6021	17.9175	4.74112	0.688369	3.70265	0.387546	2.6373	3.83	1.2497	0.410018
WL	5	2	18.3907	4.69266	6.8627	17.9155	34.6553	15.1425	2.34064	0	0	0	0.420713	18.3907	4.69266	6.8627	17.9155	34.6553	15.1425	2.34064	0	0	0	2.73004	10.4886	3.04358	4.80488	15.093	37.7925	20.7373	5.04105	0.194849	2.4094	0.39492	2.61724	2.79	1.25185	0.335183
WL	5	3	18.4033	4.48003	6.37073	16.6036	35.3085	16.6283	2.20548	0	0	0	0.416207	18.4033	4.48003	6.37073	16.6036	35.3085	16.6283	2.20548	0	0	0	2.72774	10.2085	2.90904	4.40264	14.0398	39.8531	22.4849	4.93989	0.06472	1.03416	0.063305	2.60868	2.17	1.3074	0.256663
WL	5	4	18.6218	4.84729	7.34688	19.2265	34.6217	14.1335	1.20228	0	0	0	0.428509	18.6218	4.84729	7.34688	19.2265	34.6217	14.1335	1.20228	0	0	0	2.73393	9.48944	2.83575	4.59989	15.5504	41.1877	22.2833	4.05359	0	0	0	2.59765	1.86	1.338	0.233532
WL	5	5	16.4394	4.2722	6.26386	16.7414	36.4474	17.5091	2.32656	0	0	0	0.419107	16.4394	4.2722	6.26386	16.7414	36.4474	17.5091	2.32656	0	0	0	2.7092	8.86578	2.83789	4.86322	17.0143	42.1097	20.9112	3.39795	0	0	0	2.58918	1.36	1.34255	0.191268
NG	30	1	13.6734	3.63334	5.03917	12.552	35.4853	23.5017	6.11504	0	0	0	0.382913	13.6734	3.63334	5.03917	12.552	35.4853	23.5017	6.11504	0	0	0	2.67282	8.14225	2.407	3.48644	10.5386	37.0296	26.0948	7.82622	0.31058	2.91516	1.24926	2.56703	5.8	1.18855	0.629036
NG	30	2	13.958	3.67956	5.11466	13.0181	36.1871	23.2658	4.77682	0	0	0	0.392238	13.958	3.67956	5.11466	13.0181	36.1871	23.2658	4.77682	0	0	0	2.6766	8.58959	2.53167	3.72208	11.1636	38.8435	27.5873	7.552	0.010269	0	0	2.57379	4.13	1.12575	0.519621
NG	30	3	13.0564	3.44964	4.81499	12.2852	36.5286	24.5686	5.29654	0	0	0	0.389303	13.0564	3.44964	4.81499	12.2852	36.5286	24.5686	5.29654	0	0	0	2.66389	7.56063	2.28571	3.38002	10.3852	39.8733	29.5797	6.93547	0	0	0	2.54986	3.13	1.2221	0.351161
NG	30	4	13.004	3.42554	4.85051	12.6195	37.0469	24.2088	4.84485	0	0	0	0.393797	13.004	3.42554	4.85051	12.6195	37.0469	24.2088	4.84485	0	0	0	2.66343	6.90702	2.09094	3.16763	10.335	40.5033	29.5552	7.44094	0	0	0	2.53325	2.06	1.20265	0.220816
NG	30	5	12.1018	3.16268	4.42661	11.9349	37.773	25.2723	5.32864	0	0	0	0.390885	12.1018	3.16268	4.42661	11.9349	37.773	25.2723	5.32864	0	0	0	2.64932	6.76348	2.11659	3.29039	11.2521	41.7576	28.6174	6.20244	0	0	0	2.53168	1.67	1.3012	0.190245
NG	15	1	12.9158	3.4684	4.82724	12.1632	36.4535	24.5387	5.6331	0	0	0	0.384902	12.9158	3.4684	4.82724	12.1632	36.4535	24.5387	5.6331	0	0	0	2.66231	9.32627	2.79639	4.05353	11.8474	38.2638	25.5033	6.88827	0.111212	1.10183	0.108033	2.5913	5.23	1.18585	0.527994
NG	15	2	13.5057	3.3735	4.60844	11.7954	36.6751	24.8047	5.23717	0	0	0	0.38704	13.5057	3.3735	4.60844	11.7954	36.6751	24.8047	5.23717	0	0	0	2.66785	7.17864	2.14959	3.13924	9.90104	40.5012	29.9038	7.22652	0	0	0	2.53916	3.05	1.2084	0.349952
NG	15	3	13.5991	3.44079	4.80654	12.786	37.3036	23.5258	4.53811	0	0	0	0.395595	13.5991	3.44079	4.80654	12.786	37.3036	23.5258	4.53811	0	0	0	2.67043	7.89774	2.40986	3.63105	11.5531	40.7338	27.8349	5.93951	0	0	0	2.55972	2.28	1.19745	0.241368
NG	15	4	13.3712	3.40036	4.79058	12.5875	36.879	24.1376	4.83374	0	0	0	0.393008	13.3712	3.40036	4.79058	12.5875	36.879	24.1376	4.83374	0	0	0	2.66742	8.00159	2.40538	3.61146	11.5298	40.9288	27.7624	5.76049	0	0	0	2.56158	1.78	1.31365	0.201141
NG	15	5	13.5417	3.54277	5.09747	13.6035	37.3116	22.8106	4.09241	0	0	0	0.401064	13.5417	3.54277	5.09747	13.6035	37.3116	22.8106	4.09241	0	0	0	2.67152	8.6461	2.58491	4.03648	13.1198	41.0403	25.7395	4.83289	0	0	0	2.57781	1.45		0.185908
NG	30	1	14.1406	3.91957	5.8183	16.3112	37.2681	18.9124	3.62992	0	0	0	0.411442	14.1406	3.91957	5.8183	16.3112	37.2681	18.9124	3.62992	0	0	0	2.68343	7.9219	2.36983	3.62129	13.1138	41.078	23.6477	5.83985	0.239244	2.00611	0.162368	2.56315	5.04	1.05475	0.513531
NG	30	2	14.1008	3.7687	5.49816	15.879	38.5433	19.4792	2.73088	0	0	0	0.416232	14.1008	3.7687	5.49816	15.879	38.5433	19.4792	2.73088	0	0	0	2.68121	9.34916	2.85429	4.4932	15.5795	42.3244	21.8377	3.56177	0	0	0	2.59521	3.12	1.08275	0.336061
NG	30	3	14.9587	4.01236	5.93656	17.2184	38.2721	17.5167	2.0852	0	0	0	0.423872	14.9587	4.01236	5.93656	17.2184	38.2721	17.5167	2.0852	0	0	0	2.69313	8.82219	2.69918	4.2386	14.7625	42.4211	23.0574	3.99901	0	0	0	2.58379	2.44	1.0962	0.293014
NG	30	4	15.4709	3.925	5.60522	16.1119	38.4921	18.3518	2.04306	0	0	0	0.419693	15.4709	3.925	5.60522	16.1119	38.4921	18.3518	2.04306	0	0	0	2.69658	9.14512	2.73471	4.2895	15.4214	43.4322	22.0374	2.93961	0	0	0	2.59016	1.99	1.33085	0.221061
NG	30	5	14.4204	4.1089	6.29845	18.218	38.2483	16.9772	1.72875	0	0	0	0.429138	14.4204	4.1089	6.29845	18.218	38.2483	16.9772	1.72875	0	0	0	2.68928	9.30003	2.98795	5.0725	18.1856	42.7705	19.1652	2.51816	0	0	0	2.59887	1.97	1.31205	0.244468
NG	9	1	13.3231	3.37713	4.63343	12.1135	36.6584	24.5713	5.32317	0	0	0	0.387178	13.3231	3.37713	4.63343	12.1135	36.6584	24.5713	5.32317	0	0	0	2.66606	10.4625	2.72477	3.79969	10.7362	37.2469	26.1905	7.31076	0.083207	1.2713	0.174187	2.60719	3.93	1.1843	0.438728
NG	9	2	12.7689	3.11651	4.26917	11.525	37.2878	25.3014	5.73118	0	0	0	0.386057	12.7689	3.11651	4.26917	11.525	37.2878	25.3014	5.73118	0	0	0	2.65667	9.98265	2.58033	3.5936	10.756	39.6888	27.2775	6.1211	0	0	0	2.59675	2.53	1.25745	0.27121
NG	9	3	13.5125	3.37151	4.62324	12.0556	36.9463	24.4867	5.00405	0	0	0	0.390173	13.5125	3.37151	4.62324	12.0556	36.9463	24.4867	5.00405	0	0	0	2.66813	7.17171	2.1176	3.03186	9.25414	40.7126	30.674	7.03809	0	0	0	2.53752	2.05	1.3	0.202069
NG	9	4	13.1653	3.35173	4.75346	12.9895	37.5027	23.6124	4.62486	0	0	0	0.396793	13.1653	3.35173	4.75346	12.9895	37.5027	23.6124	4.62486	0	0	0	2.66494	8.07132	2.33571	3.49984	11.5623	41.3356	27.5105	5.68466	0	0	0	2.56193	1.73	1.18905	0.18104
NG	9	5	12.9736	3.28448	4.56479	12.2751	37.6459	24.3685	4.88764	0	0	0	0.393264	12.9736	3.28448	4.56479	12.2751	37.6459	24.3685	4.88764	0	0	0	2.66135	8.48685	2.50251	3.82342	12.4532	41.2574	26.3639	5.1127	0	0	0	2.57301	1.76	1.25615	0.163519
WL	50	1	11.5777	3.28022	4.614	11.888	35.0645	23.9142	6.92428	0.182307	2.28654	0.268196	0.362242	11.5777	3.28022	4.614	11.888	35.0645	23.9142	6.92428	0.182307	2.28654	0.268196	2.64589	6.94367	2.17815	3.21717	10.2145	38.5792	27.2111	8.19387	0.317047	2.63727	0.508039	2.53793	8.42	1.2318	0.860674
WL	50	2	12.4497	3.38623	4.72906	12.3431	37.0536	24.6615	5.37683	0	0	0	0.386482	12.4497	3.38623	4.72906	12.3431	37.0536	24.6615	5.37683	0	0	0	2.65606	8.51514	2.50022	3.61697	10.6209	39.1812	28.1531	7.41257	0	0	0	2.57129	5.47	1.2095	0.543709
WL	50	3	12.1484	3.07745	4.22633	11.0553	37.2073	26.4333	5.85186	0	0	0	0.382138	12.1484	3.07745	4.22633	11.0553	37.2073	26.4333	5.85186	0	0	0	2.64821	8.3993	2.45622	3.61086	10.6805	38.592	28.4642	7.79693	0	0	0	2.56884	3.44	1.29195	0.381002
WL	50	4	11.631	3.01633	4.21579	11.122	37.2206	26.6388	6.15542	0	0	0	0.382746	11.631	3.01633	4.21579	11.122	37.2206	26.6388	6.15542	0	0	0	2.64115	7.38977	2.21408	3.25249	9.91025	40.0974	29.8409	7.29508	0	0	0	2.54472	2.64	1.33515	0.297192
WL	50	5	11.921	3.09358	4.34813	11.6959	37.7632	25.7195	5.45869	0	0	0	0.388996	11.921	3.09358	4.34813	11.6959	37.7632	25.7195	5.45869	0	0	0	2.64619	8.30863	2.45846	3.72533	11.7923	40.6155	27.3282	5.77158	0	0	0	2.56848	1.91	1.35455	0.206284
NG	11	1	12.4062	3.3027	4.573	11.8388	36.8674	25.0203	5.98706	0.004652	0	0	0.385389	12.4062	3.3027	4.573	11.8388	36.8674	25.0203	5.98706	0.004652	0	0	2.65433	8.78806	2.55683	3.63055	10.1806	38.158	27.7382	7.67425	0.068614	1.04189	0.162991	2.57733	4.21	1.2259	0.449947
NG	11	2	12.7458	3.19547	4.34045	11.1282	36.7121	25.8793	5.99869	0	0	0	0.382134	12.7458	3.19547	4.34045	11.1282	36.7121	25.8793	5.99869	0	0	0	2.65674	9.13494	2.6216	3.78301	11.1255	39.6005	27.647	6.08748	0	0	0	2.58409	3.02	1.29165	0.357987
NG	11	3	13.1357	3.24627	4.42177	11.4976	36.8729	25.1034	5.7223	0	0	0	0.385681	13.1357	3.24627	4.42177	11.4976	36.8729	25.1034	5.7223	0	0	0	2.6622	8.86828	2.46773	3.53823	10.5239	39.4823	28.2378	6.88187	0	0	0	2.57691	2.42	1.29665	0.302795
NG	11	4	12.5512	3.2196	4.52853	12.0915	37.2548	25.039	5.31534	0	0	0	0.390293	12.5512	3.2196	4.52853	12.0915	37.2548	25.039	5.31534	0	0	0	2.65564	8.19353	2.42494	3.71618	12.021	40.8991	27.1721	5.57323	0	0	0	2.5662	1.65	1.28645	0.206365
NG	11	5	11.4359	2.87002	3.95564	11.2388	39.0163	26.2549	5.22844	0	0	0	0.389879	11.4359	2.87002	3.95564	11.2388	39.0163	26.2549	5.22844	0	0	0	2.63694	7.57993	2.2066	3.28499	10.3872	40.7528	29.3476	6.44084	0	0	0	2.54912	1.21	1.3068	0.186712
NG	5	1	12.2246	3.20858	4.48918	12.8191	38.736	23.744	4.77865	0	0	0	0.396927	12.2246	3.20858	4.48918	12.8191	38.736	23.744	4.77865	0	0	0	2.65196	8.25503	2.39834	3.58668	12.4776	40.9324	24.2766	5.82359	0.311304	1.91973	0.018653	2.56881	3.79	1.23815	0.477748
NG	5	2	12.686	3.20816	4.47248	12.9793	39.3205	23.4897	3.84379	0	0	0	0.401526	12.686	3.20816	4.47248	12.9793	39.3205	23.4897	3.84379	0	0	0	2.65767	8.38457	2.40957	3.62658	13.1594	43.1738	25.0631	4.18294	0	0	0	2.57027	2.58	1.2603	0.353459
NG	5	3	12.5894	3.17093	4.44955	13.1557	39.6014	23.313	3.71991	0	0	0	0.403431	12.5894	3.17093	4.44955	13.1557	39.6014	23.313	3.71991	0	0	0	2.65633	8.25796	2.32811	3.54042	14.0054	44.9654	23.7324	3.17035	0	0	0	2.56761	2.14	1.27095	0.296532
NG	5	4	12.5896	3.18844	4.50867	13.363	39.6169	23.1447	3.58872	0	0	0	0.404876	12.5896	3.18844	4.50867	13.363	39.6169	23.1447	3.58872	0	0	0	2.65672	8.26104	2.37186	3.65672	13.8769	44.1697	24.2343	3.42951	0	0	0	2.56834	1.78	1.3016	0.274756
NG	5	5	12.8808	3.33048	4.78606	13.9688	39.2971	22.3515	3.38516	0	0	0	0.40786	12.8808	3.33048	4.78606	13.9688	39.2971	22.3515	3.38516	0	0	0	2.66215	7.95747	2.2731	3.47163	13.0617	44.1099	25.3419	3.78431	0	0	0	2.56036	1.74	1.31075	0.226981
NG	11	1	14.7087	3.85401	5.52502	15.1009	37.0608	20.1702	3.58046	0	0	0	0.405949	14.7087	3.85401	5.52502	15.1009	37.0608	20.1702	3.58046	0	0	0	2.68775	8.44481	2.45495	3.82971	14.1626	41.7488	22.5324	4.95222	0.151562	1.71243	0.010454	2.57479	4.6	1.1834	0.538059
NG	11	2	14.1802	3.67725	5.29373	14.8223	37.7522	20.6503	3.62398	0	0	0	0.407836	14.1802	3.67725	5.29373	14.8223	37.7522	20.6503	3.62398	0	0	0	2.68056	8.69172	2.45287	3.72509	13.4606	42.8796	24.417	4.3731	0	0	0	2.57681	3.27	1.1902	0.421513
NG	11	3	13.1988	3.49241	5.21394	15.3755	38.656	20.87	3.19342	0	0	0	0.413103	13.1988	3.49241	5.21394	15.3755	38.656	20.87	3.19342	0	0	0	2.66871	7.32936	2.12314	3.32965	13.1769	44.3621	25.4893	4.18964	0	0	0	2.54594	2.08	1.2883	0.300878
NG	11	4	13.4545	3.60503	5.4401	15.9856	38.4167	20.0748	3.02323	0	0	0	0.416117	13.4545	3.60503	5.4401	15.9856	38.4167	20.0748	3.02323	0	0	0	2.67313	6.82414	1.99216	3.24866	13.4362	44.7331	25.776	3.98969	0	0	0	2.53361	1.86	1.3284	0.236856
NG	11	5	13.3406	3.61914	5.41443	15.9045	38.8118	20.0491	2.86052	0	0	0	0.417245	13.3406	3.61914	5.41443	15.9045	38.8118	20.0491	2.86052	0	0	0	2.6718	7.73102	2.3536	3.98266	15.0907	43.0187	23.4801	4.3432	0	0	0	2.56027	1.81	1.29635	0.235647
NG	5	1	12.7651	3.20669	4.45874	12.8471	38.6876	23.5061	4.52869	0	0	0	0.397901	12.7651	3.20669	4.45874	12.8471	38.6876	23.5061	4.52869	0	0	0	2.65855	8.71947	2.40347	3.46406	11.4427	39.7188	25.0022	6.04046	0.201641	2.60678	0.400411	2.57693	3.09	1.2118	0.409599
NG	5	2	12.5364	3.12378	4.35471	12.739	39.1928	23.894	4.15937	0	0	0	0.399497	12.5364	3.12378	4.35471	12.739	39.1928	23.894	4.15937	0	0	0	2.65489	8.45329	2.40154	3.606	13.109	43.1287	24.8766	4.42491	0	0	0	2.57138	2.14	1.1676	0.251081
NG	5	3	12.3344	3.13119	4.43776	13.3291	39.8625	23.2364	3.66876	0	0	0	0.404981	12.3344	3.13119	4.43776	13.3291	39.8625	23.2364	3.66876	0	0	0	2.65304	7.67319	2.16658	3.20535	12.0494	44.2174	26.5656	4.12255	0	0	0	2.55186	1.93	1.2084	0.250776
NG	5	4	12.5263	3.18298	4.55999	13.4795	39.3368	23.1037	3.81077	0	0	0	0.404321	12.5263	3.18298	4.55999	13.4795	39.3368	23.1037	3.81077	0	0	0	2.65614	8.37564	2.34983	3.52266	12.5983	43.005	25.8217	4.32686	0	0	0	2.56873	1.86	1.31685	0.253972
NG	5	5	12.9338	3.37829	5.02059	15.0093	39.1127	21.3226	3.22272	0	0	0	0.412492	12.9338	3.37829	5.02059	15.0093	39.1127	21.3226	3.22272	0	0	0	2.66429	7.98235	2.35028	3.79783	14.5301	43.9356	23.8749	3.52899	0	0	0	2.56393	1.51	1.3382	0.216275
NG	2	1	13.7174	3.46859	4.87085	13.6002	38.3339	22.3318	3.6772	0	0	0	0.403028	13.7174	3.46859	4.87085	13.6002	38.3339	22.3318	3.6772	0	0	0	2.67258	10.0179	2.82053	4.14601	13.0664	40.1374	24.361	5.45075	0	0	0	2.60273	2.83	1.1733	0.374097
NG	2	2	13.3313	3.36572	4.78423	13.6866	38.7256	22.4741	3.63246	0	0	0	0.404694	13.3313	3.36572	4.78423	13.6866	38.7256	22.4741	3.63246	0	0	0	2.66746	9.01451	2.55008	3.8093	13.0275	41.8364	24.902	4.8602	0	0	0	2.58317	1.96	1.2386	0.286426
NG	2	3	13.0658	3.22705	4.55291	13.0991	38.7145	23.265	4.07555	0	0	0	0.400723	13.0658	3.22705	4.55291	13.0991	38.7145	23.265	4.07555	0	0	0	2.66264	9.58956	2.6989	4.03428	13.4564	41.5923	24.3386	4.29001	0	0	0	2.59493	1.85	1.1843	0.267161
NG	2	4	13.1966	3.2421	4.55287	12.9801	38.5692	23.3153	4.14384	0	0	0	0.399905	13.1966	3.2421	4.55287	12.9801	38.5692	23.3153	4.14384	0	0	0	2.66419	8.28648	2.3522	3.48356	12.3209	43.123	26.1564	4.27754	0	0	0	2.5667	1.65	1.30455	0.230303
NG	2	5	13.2805	3.29285	4.65758	13.4591	39.0723	22.6327	3.60497	0	0	0	0.404575	13.2805	3.29285	4.65758	13.4591	39.0723	22.6327	3.60497	0	0	0	2.66601	8.29097	2.34806	3.52452	13.0284	43.9087	25.1686	3.73078	0	0	0	2.56751	1.59	1.3669	0.242188
NG	9	1	17.1548	4.77211	7.29324	19.514	34.6442	14.3896	2.23213	0	0	0	0.423265	17.1548	4.77211	7.29324	19.514	34.6442	14.3896	2.23213	0	0	0	2.72119	8.40904	2.56494	4.20683	14.8597	38.8567	21.4291	6.21859	0.568568	2.60899	0.2776	2.57817	5.18	1.24965	0.568076
NG	9	2	18.3964	4.97762	7.62455	20.4153	34.3774	13.15	1.05875	0	0	0	0.430824	18.3964	4.97762	7.62455	20.4153	34.3774	13.15	1.05875	0	0	0	2.73357	8.3583	2.50948	4.02167	14.1468	41.0792	24.2417	5.64279	0	0	0	2.57292	3.84	1.2303	0.485771
NG	9	3	19.196	5.1377	7.78617	20.3829	33.9826	12.7591	0.755529	0	0	0	0.431675	19.196	5.1377	7.78617	20.3829	33.9826	12.7591	0.755529	0	0	0	2.74094	8.90025	2.65744	4.31068	14.6214	39.6866	23.6696	6.15398	0	0	0	2.58507	3.33	1.4109	0.420628
NG	9	4	20.5922	5.35385	7.89852	20.0134	32.8221	12.1697	1.15024	0	0	0	0.428596	20.5922	5.35385	7.89852	20.0134	32.8221	12.1697	1.15024	0	0	0	2.75263	9.57406	2.8445	4.56895	14.7674	37.4095	22.2669	6.72079	0.256192	1.5013	0.090338	2.59997	3.22	1.4386	0.424933
NG	9	5	20.0509	5.27086	7.89795	20.4734	33.2424	12.0472	1.01734	0	0	0	0.430846	20.0509	5.27086	7.89795	20.4734	33.2424	12.0472	1.01734	0	0	0	2.7484	10.1084	2.9835	4.80565	15.2451	36.8935	21.6674	6.52792	0.221555	1.53266	0.014372	2.61022	3.31		0.408633
SL	36	1	12.8147	3.45629	4.83751	13.068	36.8928	22.4968	5.40024	0.056782	0.930163	0.046633	0.384336	12.8147	3.45629	4.83751	13.068	36.8928	22.4968	5.40024	0.056782	0.930163	0.046633	2.66248	7.98376	2.3438	3.44427	11.5253	39.4522	24.9781	6.61554	0.337018	2.67085	0.649123	2.56323	6.97	1.2867	0.794358
SL	36	2	13.1544	3.42053	4.87617	13.7615	38.1639	22.4729	4.15059	0	0	0	0.401597	13.1544	3.42053	4.87617	13.7615	38.1639	22.4729	4.15059	0	0	0	2.66601	8.01174	2.25264	3.35506	12.0976	42.4692	26.4082	5.40562	0	0	0	2.56003	3.6	1.26075	0.43987
SL	36	3	12.1696	3.22427	4.71781	13.8341	38.9112	23.0617	4.08125	0	0	0	0.404254	12.1696	3.22427	4.71781	13.8341	38.9112	23.0617	4.08125	0	0	0	2.6526	7.12507	2.09532	3.33148	13.2424	43.7428	25.3803	5.08267	0	0	0	2.54149	2.4	1.2433	0.29893
SL	36	4	12.175	3.19837	4.72263	14.0871	38.8889	22.6952	4.23276	0	0	0	0.405512	12.175	3.19837	4.72263	14.0871	38.8889	22.6952	4.23276	0	0	0	2.65273	6.51022	1.94283	3.15235	12.7585	44.0565	26.7231	4.85647	0	0	0	2.52493	1.83	1.3042	0.271517
SL	36	5	12.4045	3.22385	4.67954	13.5829	38.6068	23.0499	4.45247	0	0	0	0.40257	12.4045	3.22385	4.67954	13.5829	38.6068	23.0499	4.45247	0	0	0	2.65529	7.43533	2.25313	3.55759	13.2127	43.2621	25.6621	4.6171	0	0	0	2.55028	1.55	1.30795	0.211572
NG	2	1	15.7408	4.14972	6.07811	16.792	36.3279	17.6095	3.30193	0	0	0	0.413432	15.7408	4.14972	6.07811	16.792	36.3279	17.6095	3.30193	0	0	0	2.70173	7.80204	2.34985	3.72687	13.4098	40.0725	23.0486	5.69542	0.23277	2.7029	0.959261	2.56281	4.61	1.07965	0.537562
NG	2	2	15.7477	4.03873	5.86408	16.163	36.4657	18.559	3.16186	0	0	0	0.412163	15.7477	4.03873	5.86408	16.163	36.4657	18.559	3.16186	0	0	0	2.70047	7.49862	2.22828	3.44568	12.449	42.3651	26.1835	5.82979	0	0	0	2.55032	3.57	1.12005	0.418766
NG	2	3	14.7212	3.80451	5.5853	15.8134	37.3846	19.5817	3.10937	0	0	0	0.412642	14.7212	3.80451	5.5853	15.8134	37.3846	19.5817	3.10937	0	0	0	2.68816	7.33132	2.15935	3.42679	13.0944	43.2024	25.8	4.98568	0	0	0	2.54667	2.87	1.32595	0.367524
NG	2	4	15.5419	3.93157	5.75386	16.1743	36.8262	18.8258	2.94637	0	0	0	0.413774	15.5419	3.93157	5.75386	16.1743	36.8262	18.8258	2.94637	0	0	0	2.69769	8.02022	2.31626	3.62756	13.138	42.0898	25.3691	5.4391	0	0	0	2.5627	2.58	1.2833	0.329444
NG	2	5	14.8572	3.81977	5.60407	16.125	37.8394	19.0831	2.67151	0	0	0	0.416035	14.8572	3.81977	5.60407	16.125	37.8394	19.0831	2.67151	0	0	0	2.68985	9.15372	2.65262	4.25288	14.9015	41.2608	22.9103	4.86815	0	0	0	2.58929	2.61	1.2596	0.348867
WL	20	1	13.2263	3.53706	5.04333	14.3789	38.5099	21.2977	4.00685	0	0	0	0.402602	13.2263	3.53706	5.04333	14.3789	38.5099	21.2977	4.00685	0	0	0	2.66832	8.3018	2.40973	3.56807	12.1768	40.0566	24.342	5.92837	0.185943	2.52262	0.508032	2.57047	5.51	1.1614	0.622727
WL	20	2	14.4254	3.60087	5.09847	14.6002	38.2641	20.8418	3.16909	0	0	0	0.408292	14.4254	3.60087	5.09847	14.6002	38.2641	20.8418	3.16909	0	0	0	2.68221	8.58929	2.42034	3.56548	12.3238	42.1579	25.6604	5.28277	0	0	0	2.57323	3.06	1.16785	0.408709
WL	20	3	13.6583	3.54138	5.09038	14.8299	38.9202	20.8995	3.06027	0	0	0	0.411776	13.6583	3.54138	5.09038	14.8299	38.9202	20.8995	3.06027	0	0	0	2.67359	7.74941	2.23524	3.35368	12.6516	44.2389	25.8687	3.90237	0	0	0	2.55513	2.32	1.1289	0.322425
WL	20	4	14.3919	3.60876	5.21633	15.1958	38.5764	20.1636	2.84719	0	0	0	0.413353	14.3919	3.60876	5.21633	15.1958	38.5764	20.1636	2.84719	0	0	0	2.68251	8.65877	2.47709	3.84835	13.9594	43.0092	24.0248	4.02239	0	0	0	2.57722	1.85	1.2643	0.257904
WL	20	5	13.9069	3.64553	5.40436	16.0848	38.8341	19.4149	2.70951	0	0	0	0.41845	13.9069	3.64553	5.40436	16.0848	38.8341	19.4149	2.70951	0	0	0	2.67838	7.33049	2.22145	3.79527	15.8325	45.1442	22.6384	3.0377	0	0	0	2.55088	1.67	1.23885	0.267554
NG	9	1	16.1679	4.26171	6.27146	17.2298	36.2611	17.0154	2.79257	0	0	0	0.415391	16.1679	4.26171	6.27146	17.2298	36.2611	17.0154	2.79257	0	0	0	2.70692	7.51473	2.24704	3.67545	14.3472	41.5512	22.4129	5.47702	0.364185	2.24328	0.167032	2.55548	4.96	1.0793	0.610194
NG	9	2	17.9155	4.47887	6.55821	17.9194	35.7301	15.6861	1.71189	0	0	0	0.421138	17.9155	4.47887	6.55821	17.9194	35.7301	15.6861	1.71189	0	0	0	2.72452	7.46492	2.21821	3.54009	13.2785	42.8828	25.3078	5.30764	0	0	0	2.55062	3.81	1.06655	0.46613
NG	9	3	17.8122	4.6428	6.8958	18.719	35.5204	14.8119	1.59786	0	0	0	0.425949	17.8122	4.6428	6.8958	18.719	35.5204	14.8119	1.59786	0	0	0	2.72529	8.4785	2.49934	4.02766	14.7227	42.501	23.4231	4.34761	0	0	0	2.57542	3.11	1.17685	0.398325
NG	9	4	18.0799	4.79303	7.22783	19.583	35.232	13.9787	1.1054	0	0	0	0.430453	18.0799	4.79303	7.22783	19.583	35.232	13.9787	1.1054	0	0	0	2.72914	8.91573	2.64895	4.34235	15.7246	42.3382	22.1066	3.92357	0	0	0	2.58607	2.48	1.31715	0.323722
NG	9	5	19.2663	5.22774	8.14431	21.693	33.5088	11.5624	0.597476	0	0	0	0.436554	19.2663	5.22774	8.14431	21.693	33.5088	11.5624	0.597476	0	0	0	2.74298	10.7901	3.23512	5.4647	18.5555	40.1529	18.5135	3.28813	0	0	0	2.62439	2.82	1.2932	0.352751
WL	20	1	12.7754	3.33737	4.70909	13.1463	37.7561	23.2471	5.02878	0	0	0	0.380947	12.7754	3.33737	4.70909	13.1463	37.7561	23.2471	5.02878	0	0	0	2.66028	8.34042	2.44139	3.61759	12.0467	39.534	24.4143	6.38593	0.321625	2.53443	0.363623	2.57143	8.13	1.0887	0.808548
WL	20	2	13.0409	3.297	4.63134	13.2106	38.4491	23.0454	4.32562	0	0	0	0.399389	13.0409	3.297	4.63134	13.2106	38.4491	23.0454	4.32562	0	0	0	2.66303	8.67486	2.42213	3.51323	11.761	41.3782	26.1588	6.09171	0	0	0	2.57416	3.29	1.35085	0.40195
WL	20	3	13.3728	3.35045	4.74112	13.623	38.8893	22.5132	3.51012	0	0	0	0.404593	13.3728	3.35045	4.74112	13.623	38.8893	22.5132	3.51012	0	0	0	2.6677	8.48827	2.38789	3.48143	11.8882	42.1587	26.4816	5.11393	0	0	0	2.5704	2.35	1.271	0.340328
WL	20	4	12.6032	3.10079	4.40825	12.8576	39.0308	23.7608	4.23852	0	0	0	0.399823	12.6032	3.10079	4.40825	12.8576	39.0308	23.7608	4.23852	0	0	0	2.6558	7.27022	2.06798	3.17046	12.38	44.2	26.5499	4.36141	0	0	0	2.54278	1.61	1.31885	0.244193
WL	20	5	12.5332	3.27722	4.78868	14.1793	39.0808	22.4303	3.71047	0	0	0	0.407635	12.5332	3.27722	4.78868	14.1793	39.0808	22.4303	3.71047	0	0	0	2.65781	7.72103	2.35694	3.84994	14.0787	42.7919	24.6382	4.56327	0	0	0	2.55879	1.43	1.3185	0.20294
WL	20	1	13.1432	3.39093	4.73367	13.1468	37.7503	23.0065	4.82847	0	0	0	0.393492	13.1432	3.39093	4.73367	13.1468	37.7503	23.0065	4.82847	0	0	0	2.66501	8.93009	2.53479	3.74592	12.1209	38.7725	23.9419	5.95847	0.246384	3.14175	0.60732	2.58399	5.28	1.18885	0.610096
WL	20	2	14.1267	3.47338	4.78437	13.3588	38.0104	22.2759	3.97031	0	0	0	0.400144	14.1267	3.47338	4.78437	13.3588	38.0104	22.2759	3.97031	0	0	0	2.67684	9.75778	2.74936	4.19287	14.2586	41.221	22.9757	4.8447	0	0	0	2.59919	3.3	1.19215	0.42984
WL	20	3	13.8719	3.39088	4.77469	13.6186	38.2263	22.3366	3.78101	0	0	0	0.402663	13.8719	3.39088	4.77469	13.6186	38.2263	22.3366	3.78101	0	0	0	2.6737	9.05677	2.53826	3.76194	12.4302	41.4082	25.8494	4.95532	0	0	0	2.58312	2.13	1.2943	0.340706
WL	20	4	13.5441	3.38951	4.81027	13.768	38.2522	22.3016	3.93438	0	0	0	0.403642	13.5441	3.38951	4.81027	13.768	38.2522	22.3016	3.93438	0	0	0	2.67018	7.77537	2.19954	3.3252	12.2911	43.5377	26.3342	4.53689	0	0	0	2.55492	1.64	1.211	0.238236
WL	20	5	12.2086	3.15507	4.51492	13.4609	39.6932	23.1925	3.77484	0	0	0	0.405427	12.2086	3.15507	4.51492	13.4609	39.6932	23.1925	3.77484	0	0	0	2.6519	6.93684	2.0738	3.32336	12.8884	43.9753	26.294	4.50837	0	0	0	2.53675	1.51	1.32695	0.193184
WL	50	1	11.9885	3.44824	4.78915	12.015	35.0553	23.7718	7.09584	0.295819	1.52791	0.012369	0.321616	11.9885	3.44824	4.78915	12.015	35.0553	23.7718	7.09584	0.295819	1.52791	0.012369	2.65196	7.03783	2.22655	3.25197	9.45856	34.9869	26.7961	9.88735	0.856771	4.27836	1.2196	2.54238	13.56	1.0072	1.10109
WL	50	2	15.8263	4.06348	5.42903	12.8534	34.8652	22.2076	4.75509	0	0	0	0.388335	15.8263	4.06348	5.42903	12.8534	34.8652	22.2076	4.75509	0	0	0	2.69857	9.51701	2.81923	4.02451	11.0504	37.8871	27.106	7.57974	0.01599	0	0	2.59283	5.04	1.08055	0.546049
WL	50	3	15.2382	3.78349	5.08224	12.3464	35.3024	23.3468	4.90053	0	0	0	0.387566	15.2382	3.78349	5.08224	12.3464	35.3024	23.3468	4.90053	0	0	0	2.69025	9.19985	2.77061	4.06534	10.9678	37.9359	28.1061	6.95441	0	0	0	2.58718	3.69	1.25055	0.397096
WL	50	4	15.2963	3.65612	4.92946	11.9225	34.6419	23.9022	5.65156	0	0	0	0.38348	15.2963	3.65612	4.92946	11.9225	34.6419	23.9022	5.65156	0	0	0	2.68965	56.1258	19.4182	20.2791	4.17679	0	0	0	0	0	0	2.93541	2.1	1.20135	0.371254
WL	50	5	14.7534	3.73136	5.17375	13.328	36.4992	22.4148	4.09945	0	0	0	0.398312	14.7534	3.73136	5.17375	13.328	36.4992	22.4148	4.09945	0	0	0	2.68574	11.0508	3.13972	4.5552	12.4915	38.0349	25.3503	5.37762	0	0	0	2.62087	1.66	1.29195	0.308642
OL	10	1	15.9073	3.93961	5.49061	14.8703	36.2174	19.5755	3.9994	0	0	0	0.404325	15.9073	3.93961	5.49061	14.8703	36.2174	19.5755	3.9994	0	0	0	2.70014	12.0889	3.66929	5.45195	14.9564	36.4953	20.4045	5.16832	0.306774	1.44879	0.009718	2.64347	3.64	0.9993	1.93569
OL	10	2	16.8787	4.24981	5.98822	15.9956	36.1938	18.0231	2.6708	0	0	0	0.413568	16.8787	4.24981	5.98822	15.9956	36.1938	18.0231	2.6708	0	0	0	2.71228	11.9192	3.51457	5.36793	16.3245	39.779	20.2064	2.88844	0	0	0	2.63964	2.61	1.11375	1.3463
OL	10	3	15.8552	3.88445	5.52753	15.683	37.6476	18.9047	2.49756	0	0	0	0.41473	15.8552	3.88445	5.52753	15.683	37.6476	18.9047	2.49756	0	0	0	2.6998	9.57121	2.77559	4.24281	14.192	41.4672	23.69	4.06121	0	0	0	2.59641	1.88	1.09545	1.02965
OL	10	4	15.2273	3.59745	5.01586	14.7551	38.2165	20.0429	3.14487	0	0	0	0.410144	15.2273	3.59745	5.01586	14.7551	38.2165	20.0429	3.14487	0	0	0	2.69056	8.94618	2.57382	3.99076	15.6095	44.3984	21.8081	2.67327	0	0	0	2.58473	1.43	1.09875	0.644542
OL	10	5	16.2031	3.99089	5.71215	15.9467	36.9586	18.576	2.61257	0	0	0	0.414623	16.2031	3.99089	5.71215	15.9467	36.9586	18.576	2.61257	0	0	0	2.7042	11.0186	3.23504	5.14581	16.8548	40.539	20.2791	2.92761	0	0	0	2.62562	1.56		0.523701
OL	5	1	18.3515	4.6997	6.56092	17.3291	35.287	15.5369	2.23475	0	0	0	0.418659	18.3515	4.6997	6.56092	17.3291	35.287	15.5369	2.23475	0	0	0	2.72892	12.3388	3.57731	5.35205	15.745	37.2375	19.0568	4.5584	0.354169	1.76252	0.017457	2.64661	3.68	1.06045	1.38534
OL	5	2	18.609	4.65633	6.51126	17.3563	35.771	15.6304	1.46575	0	0	0	0.420337	18.609	4.65633	6.51126	17.3563	35.771	15.6304	1.46575	0	0	0	2.73076	12.8615	3.70332	5.55072	16.2228	37.6152	19.2875	4.11784	0.058566	0.574343	0.008258	2.65344	3.69	1.10525	0.814408
OL	5	3	20.0704	5.19998	7.50874	19.3456	33.8959	13.1117	0.867631	0	0	0	0.428087	20.0704	5.19998	7.50874	19.3456	33.8959	13.1117	0.867631	0	0	0	2.74715	12.4319	3.48004	5.23204	15.5005	37.1023	20.2806	5.22049	0.049183	0.652523	0.050495	2.64585	2.97	1.1731	0.498078
OL	5	4	22.9001	5.55269	7.8734	19.419	31.6499	11.5903	1.01465	0	0	0	0.425174	22.9001	5.55269	7.8734	19.419	31.6499	11.5903	1.01465	0	0	0	2.76961	12.4697	3.53138	5.38646	15.5747	35.3322	19.976	6.19833	0.271691	1.23981	0.019749	2.64762	2.79	1.23825	0.324441
OL	5	5	22.0565	5.55633	8.15017	20.9533	32.3777	10.3461	0.559911	0	0	0	0.433214	22.0565	5.55633	8.15017	20.9533	32.3777	10.3461	0.559911	0	0	0	2.76476	13.3267	3.81239	5.89482	16.9468	34.9205	18.2238	5.5961	0.218286	1.05072	0.009967	2.66132	2.81	1.29135	0.311833
OL	5	1	18.8023	4.60742	6.4956	17.3577	35.0638	15.6495	2.02363	0	0	0	0.415099	18.8023	4.60742	6.4956	17.3577	35.0638	15.6495	2.02363	0	0	0	2.7322	13.9376	3.9308	5.79628	16.3813	36.0131	17.8086	3.93228	0.194628	1.8869	0.11852	2.669	4.99	1.21	0.845891
OL	5	2	18.6379	4.60769	6.45851	17.2758	35.3582	15.6721	1.98969	0	0	0	0.418135	18.6379	4.60769	6.45851	17.2758	35.3582	15.6721	1.98969	0	0	0	2.73073	12.1143	3.44879	5.1728	15.5248	37.6502	19.8223	4.48537	0.099911	1.42395	0.257575	2.64234	3.72	1.18615	0.991683
OL	5	3	19.3469	4.75486	6.73049	17.4423	34.6684	15.4335	1.62354	0	0	0	0.419486	19.3469	4.75486	6.73049	17.4423	34.6684	15.4335	1.62354	0	0	0	2.73764	12.4389	3.50579	5.23428	15.3017	38.3852	21.1258	4.00831	0	0	0	2.64527	2.7	1.1595	1.02682
OL	5	4	18.144	4.41221	6.24468	17.0498	35.9065	16.3186	1.92427	0	0	0	0.418971	18.144	4.41221	6.24468	17.0498	35.9065	16.3186	1.92427	0	0	0	2.72523	11.4119	3.2048	4.80689	15.0896	40.0295	21.6339	3.82344	0	0	0	2.62882	2.47	1.16735	0.560982
OL	5	5	20.5701	4.95984	7.03371	18.1848	33.8327	14.1055	1.31329	0	0	0	0.421594	20.5701	4.95984	7.03371	18.1848	33.8327	14.1055	1.31329	0	0	0	2.74886	12.8515	3.55965	5.38069	15.7018	36.3872	20.0401	5.24489	0.138176	0.683826	0.012176	2.65197	2.94	1.3083	0.299614
OL	10	1	17.5702	4.68591	6.47583	16.3851	35.5268	17.1959	2.16033	0	0	0	0.405301	17.5702	4.68591	6.47583	16.3851	35.5268	17.1959	2.16033	0	0	0	2.72143	11.5996	3.55107	5.28769	15.0433	37.0077	20.0777	4.5998	0.245317	2.38968	0.198149	2.63695	7.05	1.2165	1.31124
OL	10	2	17.4604	4.74149	6.65171	16.9989	35.6152	16.5714	1.96077	0	0	0	0.409843	17.4604	4.74149	6.65171	16.9989	35.6152	16.5714	1.96077	0	0	0	2.72132	10.6588	3.20708	4.7828	13.9343	36.8823	22.0693	6.13092	0.226169	1.9549	0.153454	2.61935	6.79	1.2727	0.68984
OL	10	3	17.7497	4.72395	6.63008	16.9593	35.3578	16.669	1.91023	0	0	0	0.41471	17.7497	4.72395	6.63008	16.9593	35.3578	16.669	1.91023	0	0	0	2.72371	11.2037	3.35097	5.038	14.5107	38.0498	22.4705	5.37634	0	0	0	2.62721	5.09	1.36045	0.486893
OL	10	4	19.7112	4.8135	6.73734	17.5796	34.5066	15.1027	1.54914	0	0	0	0.416867	19.7112	4.8135	6.73734	17.5796	34.5066	15.1027	1.54914	0	0	0	2.74087	12.0247	3.47809	5.24413	15.4298	37.9296	21.101	4.79272	0	0	0	2.64003	4.67	1.35795	0.33095
OL	10	5	21.0826	5.21146	7.58518	19.3395	32.9799	12.8357	0.965636	0	0	0	0.426322	21.0826	5.21146	7.58518	19.3395	32.9799	12.8357	0.965636	0	0	0	2.75498	11.79	3.39164	5.41737	17.3105	39.7046	19.5494	2.83649	0	0	0	2.63797	2.51	1.40005	0.255659
OL	10	1	17.8261	4.78143	6.88194	18.0324	34.6682	15.5186	2.29135	0	0	0	0.418044	17.8261	4.78143	6.88194	18.0324	34.6682	15.5186	2.29135	0	0	0	2.72565	12.4401	3.60214	5.41357	15.7262	36.1432	18.9928	4.69363	0.286586	2.36812	0.333632	2.64899	4.78	1.38475	0.624503
OL	10	2	17.9019	4.70892	6.70179	17.6202	35.2549	15.7944	2.01792	0	0	0	0.420121	17.9019	4.70892	6.70179	17.6202	35.2549	15.7944	2.01792	0	0	0	2.72547	10.833	3.1952	4.84856	14.716	36.8286	20.4898	5.50096	0.439276	2.85701	0.291625	2.62345	3.51	1.52045	0.381755
OL	10	3	19.8182	4.94828	7.07822	18.3577	34.1872	14.278	1.33243	0	0	0	0.423829	19.8182	4.94828	7.07822	18.3577	34.1872	14.278	1.33243	0	0	0	2.74314	11.8267	3.43167	5.23072	15.402	37.1309	20.7787	5.25156	0.126979	0.807174	0.013713	2.63785	2.16	1.6145	0.354128
OL	10	4	19.43	4.70011	6.69571	17.8101	34.8876	14.9713	1.50517	0	0	0	0.422091	19.43	4.70011	6.69571	17.8101	34.8876	14.9713	1.50517	0	0	0	2.73823	11.8626	3.39348	5.17138	15.2421	37.3984	21.1202	5.03489	0.061031	0.702177	0.013805	2.6377	1.81	1.4667	0.168122
OL	10	5	18.3863	4.36173	6.19114	16.9082	36.0138	16.4432	1.6956	0	0	0	0.419221	18.3863	4.36173	6.19114	16.9082	36.0138	16.4432	1.6956	0	0	0	2.72691	10.0499	2.82359	4.25807	13.4583	38.3744	23.8138	6.38497	0.118442	0.704992	0.013576	2.60456	1.65	1.267	0.168514
OL	5	1	14.3552	4.42915	6.82156	18.9891	37.2198	15.9375	2.24768	0	0	0	0.428083	14.3552	4.42915	6.82156	18.9891	37.2198	15.9375	2.24768	0	0	0	2.69165	13.0666	3.8136	5.65395	16.2773	36.9354	18.5657	4.40894	0.125811	1.01643	0.136216	2.65734	4.37	1.4157	0.636838
OL	5	2	15.142	4.4514	6.70763	18.4436	36.6282	16.0904	2.53667	0	0	0	0.425791	15.142	4.4514	6.70763	18.4436	36.6282	16.0904	2.53667	0	0	0	2.69928	13.465	3.81011	5.6027	16.0686	36.3954	18.393	4.46528	0.174397	1.40772	0.217859	2.66216	3.37	1.42345	0.490395
OL	5	3	14.2971	4.3259	6.65641	18.9341	37.6041	15.9335	2.24874	0	0	0	0.430917	14.2971	4.3259	6.65641	18.9341	37.6041	15.9335	2.24874	0	0	0	2.69021	12.7537	3.72459	5.57283	16.4179	36.9091	18.3881	4.58899	0.235545	1.39812	0.011078	2.65319	2.5	1.44325	0.440271
OL	5	4	16.7429	5.10026	8.05806	21.8859	35.1762	12.0803	0.956418	0	0	0	0.440947	16.7429	5.10026	8.05806	21.8859	35.1762	12.0803	0.956418	0	0	0	2.72121	14.5071	4.09135	6.15605	17.6067	35.3913	16.5718	4.44841	0.218059	0.950472	0.058641	2.67681	2.48	1.3921	0.385401
OL	5	5	17.6782	5.43457	8.7429	23.3341	33.7869	10.4088	0.614523	0	0	0	0.444552	17.6782	5.43457	8.7429	23.3341	33.7869	10.4088	0.614523	0	0	0	2.73241	14.4019	4.16048	6.34734	17.8717	34.3251	16.4949	5.06376	0.321722	0.998957	0.014091	2.67664	2.57	1.39315	0.355026
NG	5	1	14.3181	4.26306	6.35205	17.0893	36.5224	17.9029	3.55219	0	0	0	0.418471	14.3181	4.26306	6.35205	17.0893	36.5224	17.9029	3.55219	0	0	0	2.68857	13.7078	3.91889	5.69296	15.5669	36.3798	19.2822	4.61235	0.092256	0.690723	0.056159	2.66463	3.03	1.36075	0.614681
NG	5	2	15.1158	4.55261	6.99302	18.5604	35.8077	16.5067	2.4638	0	0	0	0.425847	15.1158	4.55261	6.99302	18.5604	35.8077	16.5067	2.4638	0	0	0	2.70004	14.1614	4.01353	5.9196	16.1491	36.543	19.2066	4.00679	0	0	0	2.67035	2.23	1.41705	0.645266
NG	5	3	15.4211	4.68982	7.3581	19.326	35.1626	15.8585	2.18401	0	0	0	0.428805	15.4211	4.68982	7.3581	19.326	35.1626	15.8585	2.18401	0	0	0	2.70471	13.2715	3.91698	5.91764	16.2386	36.815	19.8846	3.9557	0	0	0	2.6598	1.36	1.46045	0.359984
NG	5	4	14.5422	4.3552	6.68097	17.8443	36.2222	17.7248	2.63034	0	0	0	0.423228	14.5422	4.3552	6.68097	17.8443	36.2222	17.7248	2.63034	0	0	0	2.69232	13.4918	3.78918	5.55174	15.3811	37.4	20.4646	3.92155	0	0	0	2.66031	1.27	1.42685	0.398772
NG	5	5	14.0543	4.16024	6.30635	16.8148	36.7746	19.0055	2.8842	0	0	0	0.419077	14.0543	4.16024	6.30635	16.8148	36.7746	19.0055	2.8842	0	0	0	2.68492	12.5225	3.63601	5.40358	15.0634	38.1997	21.546	3.62872	0	0	0	2.64727	1.27	1.3456	0.317571
SL	10	1	16.3049	4.68091	6.91227	17.3129	34.6609	16.9937	3.1345	0	0	0	0.417389	16.3049	4.68091	6.91227	17.3129	34.6609	16.9937	3.1345	0	0	0	2.71131	14.3249	3.95835	5.64026	14.2911	33.5521	19.325	5.91456	0.536545	2.22573	0.231427	2.67248	2.76	1.2391
SL	10	2	18.0944	5.35251	8.02261	19.0646	32.5217	14.4216	2.52261	0	0	0	0.424237	18.0944	5.35251	8.02261	19.0646	32.5217	14.4216	2.52261	0	0	0	2.73262	12.5997	3.65853	5.35653	13.5381	33.8525	21.8974	6.69592	0.292588	1.96668	0.142113	2.64926	2.02	1.27965	0.879422
SL	10	3	17.9317	5.3129	7.97504	18.9355	32.7656	14.8059	2.27342	0	0	0	0.42443	17.9317	5.3129	7.97504	18.9355	32.7656	14.8059	2.27342	0	0	0	2.73093	13.0932	3.8123	5.57653	14.1491	34.8488	21.7433	5.79175	0.100006	0.867971	0.01717	2.65587	1.74	1.2278	0.634634
SL	10	4	17.9717	5.18854	7.84699	18.5476	32.2951	15.2327	2.91734	0	0	0	0.420611	17.9717	5.18854	7.84699	18.5476	32.2951	15.2327	2.91734	0	0	0	2.73043	14.0974	4.00793	5.84294	14.548	34.4498	20.5116	4.80931	0	0.57222	1.16077	2.67038	1.37	1.26485	0.524961
SL	10	5	15.2948	4.6248	7.2795	19.5595	35.9839	15.4185	1.83889	0	0	0	0.432136	15.2948	4.6248	7.2795	19.5595	35.9839	15.4185	1.83889	0	0	0	2.70315	12.45	3.68557	5.62665	16.2607	37.9188	19.296	3.82664	0.059607	0.803376	0.072693	2.64875	0.96	1.40215	0.35269
SL	10	1	13.5734	3.98737	5.92788	16.6818	38.0278	18.6371	3.1646	0	0	0	0.419955	13.5734	3.98737	5.92788	16.6818	38.0278	18.6371	3.1646	0	0	0	2.678	12.3809	3.51881	5.10946	14.6445	36.4698	19.5632	4.99813	0.365257	2.46055	0.48927	2.64665	2.68	1.28355	0.660409
SL	10	2	14.2771	4.07764	6.00532	16.5758	37.4018	18.419	3.2433	0	0	0	0.41871	14.2771	4.07764	6.00532	16.5758	37.4018	18.419	3.2433	0	0	0	2.6862	13.3236	3.58917	5.10682	14.2423	36.455	20.1277	4.93826	0.205641	1.81706	0.194454	2.6573	2.08	1.28875	0.483062
SL	10	3	14.5108	4.02822	5.91091	16.2661	37.4155	18.7052	3.16314	0	0	0	0.417393	14.5108	4.02822	5.91091	16.2661	37.4155	18.7052	3.16314	0	0	0	2.68804	13.5024	3.64298	5.18045	14.6281	37.4208	20.3265	3.98303	0.055443	1.04462	0.215714	2.6594	1.76	1.18665	0.334966
SL	10	4	15.3886	4.54892	7.03514	19.503	36.5202	14.9934	2.0107	0	0	0	0.432484	15.3886	4.54892	7.03514	19.503	36.5202	14.9934	2.0107	0	0	0	2.70329	13.358	3.79371	5.67236	16.6671	38.556	18.6984	3.25443	0	0	0	2.65984	1.45	1.3711	0.289251
SL	10	5	14.0099	4.45257	7.43687	22.4061	37.9528	12.6342	1.10755	0	0	0	0.447263	14.0099	4.45257	7.43687	22.4061	37.9528	12.6342	1.10755	0	0	0	2.69104	12.6313	3.80483	6.14895	19.9608	40.5711	15.7547	1.12836	0	0	0	2.65415	1.05	1.5362	0.301525
SL	10	1	12.4303	3.65133	5.51668	16.0145	38.797	20.2694	3.32081	0	0	0	0.417446	12.4303	3.65133	5.51668	16.0145	38.797	20.2694	3.32081	0	0	0	2.66162	11.1529	3.13854	4.57716	13.3732	37.0595	22.04	5.85111	0.220646	2.13516	0.451827	2.62543	2.14	1.3922	0.599883
SL	10	2	13.1395	3.8843	5.84337	16.2411	37.709	19.4519	3.73084	0	0	0	0.416776	13.1395	3.8843	5.84337	16.2411	37.709	19.4519	3.73084	0	0	0	2.67215	11.5345	3.31788	4.86705	14.1891	38.28	21.8518	4.94527	0.079372	0.880829	0.054192	2.63158	1.95	1.52355	0.474165
SL	10	3	14.1636	4.25181	6.50933	17.7461	36.9632	17.6592	2.70684	0	0	0	0.424208	14.1636	4.25181	6.50933	17.7461	36.9632	17.6592	2.70684	0	0	0	2.68749	10.4954	3.10949	4.66875	14.209	39.8751	23.0885	4.55375	0	0	0	2.61428	1.6	1.5421	0.383273
SL	10	4	12.9858	4.01695	6.12056	17.7466	38.7809	17.8544	2.49484	0	0	0	0.428277	12.9858	4.01695	6.12056	17.7466	38.7809	17.8544	2.49484	0	0	0	2.67251	11.0876	3.37279	5.10689	15.9936	40.4019	20.4946	3.54257	0	0	0	2.62685	1.09	1.355	0.359482
SL	10	5	14.241	4.44053	6.97816	20.1608	37.3867	14.8644	1.9285	0	0	0	0.436834	14.241	4.44053	6.97816	20.1608	37.3867	14.8644	1.9285	0	0	0	2.69142	11.2087	3.32778	5.13719	16.6984	40.3269	19.5777	3.72332	0	0	0	2.62881	1.03	1.3459	0.365612
SL	47	1	10.2705	3.16738	4.73297	14.3487	39.1673	21.7126	4.79946	0.005919	0.946282	0.848906	0.393216	10.2705	3.16738	4.73297	14.3487	39.1673	21.7126	4.79946	0.005919	0.946282	0.848906	2.62885	8.37211	2.55282	3.74845	11.8636	37.2074	23.3295	7.40848	0.710213	3.61682	1.19066	2.57543	7.45	1.4288	0.452841
SL	47	2	11.3968	3.4106	5.11165	15.2736	38.8155	20.3837	4.03336	0.004957	0.981873	0.588062	0.407693	11.3968	3.4106	5.11165	15.2736	38.8155	20.3837	4.03336	0.004957	0.981873	0.588062	2.64722	9.72017	2.89718	4.2864	13.427	39.8479	23.3636	5.43228	0.053143	0.881642	0.090663	2.60016	4.92	1.53015	0.408465
SL	47	3	11.4394	3.42683	5.19257	15.7512	39.635	20.5966	3.95836	0	0	0	0.415492	11.4394	3.42683	5.19257	15.7512	39.635	20.5966	3.95836	0	0	0	2.647	10.2679	3.02645	4.52866	14.2204	40.2913	22.8249	4.84036	0	0	0	2.60999	3.63	1.51125	0.308423
SL	47	4	11.5242	3.46555	5.2563	15.8218	39.7955	20.6582	3.47852	0	0	0	0.417127	11.5242	3.46555	5.2563	15.8218	39.7955	20.6582	3.47852	0	0	0	2.64849	9.99655	2.95219	4.39562	13.7968	40.7882	23.6315	4.43923	0	0	0	2.60459	3.39	1.4741	0.180869
SL	47	5	10.5652	3.1934	4.94171	15.623	40.6571	21.2031	3.81639	0	0	0	0.417197	10.5652	3.1934	4.94171	15.623	40.6571	21.2031	3.81639	0	0	0	2.63295	9.97664	2.94901	4.50354	14.7277	41.3358	22.5447	3.96258	0	0	0	2.60526	3.25		0.0677321
SL	47	1	11.2528	3.4086	5.04517	14.9992	39.3318	21.2254	4.73354	0.003401	0	0	0.39969	11.2528	3.4086	5.04517	14.9992	39.3318	21.2254	4.73354	0.003401	0	0	2.64362	9.95741	2.90656	4.19726	12.6674	36.9151	22.0411	6.66546	0.699964	3.30489	0.644847	2.60605	7.29	1.46335	0.363435
SL	47	2	11.5026	3.54571	5.3736	15.9923	39.2794	20.2553	4.05107	0	0	0	0.41271	11.5026	3.54571	5.3736	15.9923	39.2794	20.2553	4.05107	0	0	0	2.64915	9.87087	2.93807	4.37663	13.5667	38.466	22.2826	5.77309	0.286595	1.96318	0.476342	2.60465	5.33	1.5116	0.31465
SL	47	3	11.4986	3.50055	5.34037	16.1682	39.8307	19.9613	3.70019	0	0	0	0.418409	11.4986	3.50055	5.34037	16.1682	39.8307	19.9613	3.70019	0	0	0	2.64884	10.2425	3.06484	4.62854	14.4176	39.5559	21.9073	4.62812	0.100084	1.27427	0.180836	2.61153	3.8	1.54235	0.241269
SL	47	4	12.5068	3.82048	5.93647	17.818	39.3069	17.8961	2.71515	0	0	0	0.426751	12.5068	3.82048	5.93647	17.818	39.3069	17.8961	2.71515	0	0	0	2.66553	10.5755	3.25154	5.03134	16.0362	40.6672	20.9065	3.53165	0	0	0	2.61865	3.5	1.55585	0.22971
SL	47	5	11.0909	3.58661	5.979	19.2944	40.6169	17.2023	2.2298	0	0	0	0.435425	11.0909	3.58661	5.979	19.2944	40.6169	17.2023	2.2298	0	0	0	2.64741	9.86483	3.1281	5.07002	17.1478	41.898	19.98	2.91125	0	0	0	2.60807	3.41	1.46805	0.173733
SL	47	1	13.4783	3.9187	5.85935	17.1636	38.7905	17.7568	3.03267	0	0	0	0.421887	13.4783	3.9187	5.85935	17.1636	38.7905	17.7568	3.03267	0	0	0	2.67675	11.2132	3.2339	4.79217	14.6752	37.9716	19.9273	4.99702	0.368212	2.36407	0.457348	2.62863	4.2	1.42225	0.363882
SL	47	2	14.3313	4.1733	6.30695	17.8913	37.8135	16.8307	2.65298	0	0	0	0.423915	14.3313	4.1733	6.30695	17.8913	37.8135	16.8307	2.65298	0	0	0	2.68859	10.9395	3.24002	4.85471	14.896	39.0703	20.9642	4.71698	0.10829	0.99069	0.219394	2.62367	4.2	1.3397	0.306117
SL	47	3	14.4381	4.40029	6.78886	18.9258	37.541	16.0869	1.81903	0	0	0	0.43037	14.4381	4.40029	6.78886	18.9258	37.541	16.0869	1.81903	0	0	0	2.69223	11.1881	3.43488	5.24884	15.9206	39.8214	20.4916	3.8946	0	0	0	2.62897	3.44	1.5439	0.275072
SL	47	4	14.6197	4.4242	6.77837	18.8052	37.3062	16.0537	2.0126	0	0	0	0.42944	14.6197	4.4242	6.77837	18.8052	37.3062	16.0537	2.0126	0	0	0	2.69415	11.1375	3.24454	4.86713	14.3701	38.0868	22.4188	5.87514	0	0	0	2.62512	3.31	1.51745	0.240244
SL	47	5	12.7784	4.09364	6.69741	20.0353	38.9578	15.7981	1.63924	0	0	0	0.437212	12.7784	4.09364	6.69741	20.0353	38.9578	15.7981	1.63924	0	0	0	2.67299	9.83925	3.12061	5.04148	16.6035	40.9831	20.4949	3.91717	0	0	0	2.60725	3.24	1.4912	0.216978
SL	30	1	11.2029	3.66856	5.54212	15.5212	37.6234	21.1639	5.27801	0	0	0	0.352697	11.2029	3.66856	5.54212	15.5212	37.6234	21.1639	5.27801	0	0	0	2.64613	9.3383	2.96003	4.2969	11.9754	33.3399	21.7428	8.95709	1.43512	4.81148	1.14297	2.59865	12.77	1.29435	0.305251
SL	30	2	12.6759	4.05813	6.12639	16.6374	37.0831	19.3634	4.05563	0	0	0	0.398545	12.6759	4.05813	6.12639	16.6374	37.0831	19.3634	4.05563	0	0	0	2.66859	9.65704	3.04244	4.48239	12.5702	35.0345	22.902	7.88535	0.666534	3.10988	0.649742	2.603	8.3	1.3957	0.305479
SL	30	3	12.8147	4.02764	6.05204	16.6396	37.5168	19.1984	3.75087	0	0	0	0.406602	12.8147	4.02764	6.05204	16.6396	37.5168	19.1984	3.75087	0	0	0	2.66987	9.949	3.07901	4.52221	12.7437	35.8522	23.4453	7.69212	0.446713	2.07307	0.196642	2.60658	7.13	1.46885	0.256421
SL	30	4	13.6178	4.22813	6.26218	16.7588	37.1178	19.0025	3.01282	0	0	0	0.412742	13.6178	4.22813	6.26218	16.7588	37.1178	19.0025	3.01282	0	0	0	2.68042	11.0501	3.29403	4.69063	12.989	37.4479	23.88	6.63967	0.008654	0	0	2.62278	5.85	1.4753	0.206648
SL	30	5	14.558	4.44938	6.76363	18.1952	36.1926	17.001	2.84015	0	0	0	0.420943	14.558	4.44938	6.76363	18.1952	36.1926	17.001	2.84015	0	0	0	2.69332	10.0674	3.04104	4.5576	13.2182	36.4584	23.5423	7.40898	0.209991	1.36626	0.129888	2.60785	4.68	1.4605	0.20855
SL	30	1	9.9542	3.34225	5.29942	16.1774	37.8676	20.0481	5.45935	0.281804	1.43596	0.133966	0.346775	9.9542	3.34225	5.29942	16.1774	37.8676	20.0481	5.45935	0.281804	1.43596	0.133966	2.62788	5.72961	2.0023	3.16538	9.77917	30.1268	23.1309	13.2896	2.65778	7.7429	2.37562	2.51448	13.49	1.0009	0.865141
SL	30	2	12.21	3.93085	6.07979	17.4702	37.8586	18.6282	3.82238	0	0	0	0.403491	12.21	3.93085	6.07979	17.4702	37.8586	18.6282	3.82238	0	0	0	2.66275	9.29838	2.94297	4.41105	12.9833	34.8829	22.0426	8.42153	1.07059	3.60045	0.346209	2.59684	8.3	1.123	0.504561
SL	30	3	12.5458	4.11563	6.50621	18.7995	36.9162	16.1018	3.08343	0.092722	1.36384	0.474769	0.414885	12.5458	4.11563	6.50621	18.7995	36.9162	16.1018	3.08343	0.092722	1.36384	0.474769	2.67099	9.76027	3.08966	4.67909	13.8287	35.5955	21.6715	7.71065	0.758888	2.70324	0.202574	2.60569	6.96	1.152	0.344106
SL	30	4	12.6073	3.96598	6.17552	17.576	37.1086	17.9252	3.16741	0	0.887269	0.58677	0.41283	12.6073	3.96598	6.17552	17.576	37.1086	17.9252	3.16741	0	0.887269	0.58677	2.66922	8.65494	2.72934	4.15836	12.4853	35.0154	23.6252	9.71864	0.877547	2.3025	0.432731	2.58213	6.17	1.27985	0.26968
SL	30	5	11.6936	3.78243	6.16594	18.5564	38.7801	18.1164	2.90519	0	0	0	0.426019	11.6936	3.78243	6.16594	18.5564	38.7801	18.1164	2.90519	0	0	0	2.65631	9.99098	3.13533	4.92122	15.1234	37.8426	20.9915	5.40717	0.234348	2.07831	0.275203	2.61042	4.55	1.32235	0.274478
SL	30	1	11.9331	3.80939	5.81743	17.1019	38.5626	18.7691	4.00275	0.003762	0	0	0.39236	11.9331	3.80939	5.81743	17.1019	38.5626	18.7691	4.00275	0.003762	0	0	2.65789	10.1795	3.11269	4.61138	13.7228	35.1279	20.1541	7.29284	1.15152	4.11161	0.535735	2.61371	9.7	1.082	0.808377
SL	30	2	12.6883	4.05121	6.17505	17.7882	38.6262	17.8778	2.79322	0	0	0	0.416154	12.6883	4.05121	6.17505	17.7882	38.6262	17.8778	2.79322	0	0	0	2.66942	10.3511	3.20859	4.78513	14.3373	37.1078	20.8262	6.3587	0.636227	2.29357	0.095313	2.61558	6.93	1.22325	0.554137
SL	30	3	13.5064	4.18014	6.42575	18.5467	38.2326	16.9174	2.19097	0	0	0	0.424722	13.5064	4.18014	6.42575	18.5467	38.2326	16.9174	2.19097	0	0	0	2.68029	10.5002	3.17435	4.80474	14.716	36.8366	20.4168	6.45225	0.614726	2.20509	0.279208	2.61804	5.47	1.2381	0.341072
SL	30	4	14.132	4.32932	6.62844	18.9864	37.8068	16.0463	2.07082	0	0	0	0.428787	14.132	4.32932	6.62844	18.9864	37.8068	16.0463	2.07082	0	0	0	2.68844	12.3486	3.61924	5.37824	15.8495	37.0809	19.0655	4.89717	0.240835	1.50689	0.013165	2.64689	4.47	1.22415	0.306262
SL	30	5	12.8918	3.91172	6.17272	19.0751	39.3582	16.6886	1.90188	0	0	0	0.43267	12.8918	3.91172	6.17272	19.0751	39.3582	16.6886	1.90188	0	0	0	2.67172	11.967	3.483	5.29055	16.7834	40.1653	19.4458	2.86505	0	0	0	2.64019	3.47	1.26805	0.274567
SL	20	1	10.9931	3.35964	5.06051	15.8299	39.8879	19.879	3.73121	0	0.732058	0.52677	0.412622	10.9931	3.35964	5.06051	15.8299	39.8879	19.879	3.73121	0	0.732058	0.52677	2.64152	9.67353	2.93289	4.36573	13.7391	38.8269	21.9647	5.86348	0.396251	2.0519	0.185612	2.60138	5.21	1.15565	0.512896
SL	20	2	11.6573	3.56387	5.44251	16.5086	39.7187	19.535	3.57401	0	0	0	0.419599	11.6573	3.56387	5.44251	16.5086	39.7187	19.535	3.57401	0	0	0	2.65172	10.1485	2.95702	4.40759	13.9268	40.3515	23.032	5.1726	0.004028	0	0	2.60717	4.01	1.2275	0.403268
SL	20	3	12.3343	3.82204	5.86803	17.3604	39.6359	18.6346	2.34468	0	0	0	0.426354	12.3343	3.82204	5.86803	17.3604	39.6359	18.6346	2.34468	0	0	0	2.663	10.3564	3.09077	4.64523	14.547	40.1198	22.0908	4.33942	0.102396	0.697183	0.010984	2.61288	3.22	1.12655	0.321642
SL	20	4	12.0425	3.77724	5.91522	18.1687	40.31	17.9408	1.8456	0	0	0	0.431623	12.0425	3.77724	5.91522	18.1687	40.31	17.9408	1.8456	0	0	0	2.65976	10.019	3.03487	4.6288	14.9573	41.1514	22.2728	3.93585	0	0	0	2.60704	3.12	1.26425	0.270589
SL	20	5	12.2605	3.93511	6.39789	19.8676	39.9569	16.259	1.32297	0	0	0	0.438448	12.2605	3.93511	6.39789	19.8676	39.9569	16.259	1.32297	0	0	0	2.6653	10.9475	3.37038	5.24883	16.7182	40.3859	19.5892	3.74013	0	0	0	2.62578	3.11	1.29335	0.284027
SL	20	1	11.0568	3.42601	5.12729	15.5558	39.8677	20.7043	4.2621	0	0	0	0.405026	11.0568	3.42601	5.12729	15.5558	39.8677	20.7043	4.2621	0	0	0	2.64167	9.89009	2.97309	4.34962	13.2274	37.2567	21.6094	6.21499	0.547345	2.91248	1.01883	2.60645	7.1	1.1304	1.21763
SL	20	2	11.076	3.40373	5.17224	16.0416	40.3267	20.3082	3.67153	0	0	0	0.415623	11.076	3.40373	5.17224	16.0416	40.3267	20.3082	3.67153	0	0	0	2.64218	9.05394	2.73217	4.10928	13.235	39.1981	23.1486	5.87856	0.191995	2.01285	0.439464	2.5887	5.23	1.2987	0.842449
SL	20	3	11.2122	3.47844	5.33803	16.408	40.1925	20.0698	3.30093	0	0	0	0.420643	11.2122	3.47844	5.33803	16.408	40.1925	20.0698	3.30093	0	0	0	2.64507	9.73858	2.94791	4.46927	14.3136	40.4211	22.8435	5.2615	0.004558	0	0	2.60124	3.67	1.2933	0.712657
SL	20	4	12.731	3.8348	5.89735	17.662	39.2483	18.119	2.50762	0	0	0	0.426096	12.731	3.8348	5.89735	17.662	39.2483	18.119	2.50762	0	0	0	2.66806	10.4992	3.15199	4.79948	15.2022	40.3042	21.859	4.18386	0	0	0	2.6157	3.42	1.3334
SL	20	5	11.5334	3.65108	5.904	18.5377	39.9037	17.8392	2.63095	0	0	0	0.430708	11.5334	3.65108	5.904	18.5377	39.9037	17.8392	2.63095	0	0	0	2.65292	10.9522	3.33952	5.2121	16.6486	40.5933	19.9681	3.28617	0	0	0	2.62545	3.22	1.2759	0.397186
SL	20	1	10.0465	3.02106	4.43217	13.6405	40.4373	23.4325	4.98981	0	0	0	0.403069	10.0465	3.02106	4.43217	13.6405	40.4373	23.4325	4.98981	0	0	0	2.62154	8.81425	2.64047	3.82403	12.0542	39.3978	24.4699	6.45957	0.306268	1.95104	0.082383	2.58151	4.84	1.29475	1.31731
SL	20	2	10.2205	3.10751	4.61715	14.2456	40.4705	22.6666	4.67211	0	0	0	0.408473	10.2205	3.10751	4.61715	14.2456	40.4705	22.6666	4.67211	0	0	0	2.62565	8.25557	2.51375	3.71564	12.2771	40.5801	24.8688	6.28075	0.165434	1.16144	0.181424	2.56967	3.93	1.3963	0.850113
SL	20	3	10.9202	3.34733	5.0852	15.9639	41.1391	20.6944	2.84989	0	0	0	0.421728	10.9202	3.34733	5.0852	15.9639	41.1391	20.6944	2.84989	0	0	0	2.63938	9.4359	2.8661	4.31458	14.2265	41.7562	23.2417	4.15897	0	0	0	2.59518	3.1	1.46335	0.685254
SL	20	4	11.5096	3.59154	5.45772	16.7133	40.308	19.3896	3.03025	0	0	0	0.423725	11.5096	3.59154	5.45772	16.7133	40.308	19.3896	3.03025	0	0	0	2.65011	10.1693	3.03521	4.51414	14.4353	40.9964	22.3844	4.46529	0	0	0	2.60868	3.27	1.50415
SL	20	5	12.3759	3.93028	6.34384	19.5798	39.5853	16.1706	2.0142	0	0	0	0.435499	12.3759	3.93028	6.34384	19.5798	39.5853	16.1706	2.0142	0	0	0	2.66645	10.0657	3.13522	4.93769	16.1955	40.6981	20.7038	4.26398	0	0	0	2.61026	3.55		0.399659
NG	30	1	9.23856	2.7624	4.01363	12.9379	41.1059	24.39	5.55171	0	0	0	0.398516	9.23856	2.7624	4.01363	12.9379	41.1059	24.39	5.55171	0	0	0	2.60542	8.62504	2.47572	3.55843	11.3709	39.094	24.7237	6.54574	0.198615	2.04928	1.35865	2.57694	5.4	1.20115	0.958415
NG	30	2	9.24635	2.76839	4.01422	12.6127	41.0314	24.9619	5.36502	0	0	0	0.399107	9.24635	2.76839	4.01422	12.6127	41.0314	24.9619	5.36502	0	0	0	2.60529	9.08704	2.57432	3.68218	11.8482	41.3004	25.6857	5.82225	0	0	0	2.58326	4.48	1.28	0.672501
NG	30	3	9.70575	2.87773	4.19282	13.3006	41.3254	24.1347	4.46306	0	0	0	0.405883	9.70575	2.87773	4.19282	13.3006	41.3254	24.1347	4.46306	0	0	0	2.61437	9.18047	2.56464	3.67665	11.8965	41.3026	25.7417	5.63746	0	0	0	2.58478	3.56	1.1772	0.541032
NG	30	4	9.77128	2.93114	4.31501	13.702	41.2012	23.8575	4.22188	0	0	0	0.408498	9.77128	2.93114	4.31501	13.702	41.2012	23.8575	4.22188	0	0	0	2.6164	9.9368	2.74351	3.98426	12.6856	40.5825	24.4179	5.64946	0	0	0	2.60014	2.9	1.3252	0.434681
NG	30	5	10.0899	2.9804	4.31609	13.4301	41.3436	23.9232	3.91687	0	0	0	0.409061	10.0899	2.9804	4.31609	13.4301	41.3436	23.9232	3.91687	0	0	0	2.62132	10.3688	2.83784	4.06418	12.6126	40.7682	24.3659	4.98247	0	0	0	2.60759	2.05	1.3259	0.2729
NG	30	1	11.447	3.59122	5.55548	17.1761	39.0454	18.5968	3.83446	0.068427	0.632284	0.052778	0.405049	11.447	3.59122	5.55548	17.1761	39.0454	18.5968	3.83446	0.068427	0.632284	0.052778	2.65044	10.0727	3.02229	4.57081	14.1586	36.108	19.3835	6.12703	0.941724	4.10913	1.50615	2.61275	8.03	1.2859	0.524536
NG	30	2	12.1695	3.73663	5.78031	17.519	38.3111	17.5223	3.17868	0.013358	1.06121	0.707991	0.415338	12.1695	3.73663	5.78031	17.519	38.3111	17.5223	3.17868	0.013358	1.06121	0.707991	2.6621	10.415	3.072	4.67178	14.7604	38.5344	20.8681	5.32626	0.232542	1.71	0.409553	2.61528	5.95	1.28805	0.45715
NG	30	3	13.597	4.19193	6.50131	19.0583	38.0893	16.0684	2.49378	0	0	0	0.428978	13.597	4.19193	6.50131	19.0583	38.0893	16.0684	2.49378	0	0	0	2.68183	9.86119	2.94371	4.51343	14.1585	37.9363	22.3629	6.77647	0.242828	1.04377	0.160847	2.60436	4.42	1.2801	0.328559
NG	30	4	12.0834	3.7125	5.78812	18.113	40.2556	17.8215	2.22585	0	0	0	0.42983	12.0834	3.7125	5.78812	18.113	40.2556	17.8215	2.22585	0	0	0	2.65962	10.0411	2.9761	4.59	15.2888	41.2574	21.5444	4.30209	0	0	0	2.60716	3.67	1.30995	0.289729
NG	30	5	13.8216	4.16578	6.51942	19.4523	38.71	15.703	1.62789	0	0	0	0.434281	13.8216	4.16578	6.51942	19.4523	38.71	15.703	1.62789	0	0	0	2.68433	10.988	3.19813	4.94641	15.6395	39.4046	21.0217	4.79798	0.003595	0	0	2.62377	3.37	1.3161	0.289776
NG	30	1	11.8413	3.64705	5.67616	17.6528	38.9323	17.6442	3.44933	0.094833	0.923549	0.138498	0.408902	11.8413	3.64705	5.67616	17.6528	38.9323	17.6442	3.44933	0.094833	0.923549	0.138498	2.65667	11.055	3.15038	4.70738	14.562	37.0534	19.5943	5.51217	0.607228	3.01251	0.745693	2.6266	7.74	1.1573	0.797183
NG	30	2	12.335	3.89251	6.10488	18.5574	39.3391	17.229	2.54209	0	0	0	0.422389	12.335	3.89251	6.10488	18.5574	39.3391	17.229	2.54209	0	0	0	2.66467	9.48064	2.86149	4.38699	14.2069	38.5743	21.353	5.74754	0.44027	2.4604	0.48849	2.59891	6.48	1.24725
NG	30	3	13.6308	4.05961	6.33403	18.9676	38.6036	16.2393	2.16499	0	0	0	0.428359	13.6308	4.05961	6.33403	18.9676	38.6036	16.2393	2.16499	0	0	0	2.68112	9.39122	2.84875	4.42001	14.3183	38.9452	22.734	6.60756	0.146695	0.578121	0.010155	2.59543	4.89	1.3143	0.407146
NG	30	4	14.0991	4.39531	6.94996	20.3235	37.787	14.6631	1.78192	0	0	0	0.43543	14.0991	4.39531	6.94996	20.3235	37.787	14.6631	1.78192	0	0	0	2.68975	11.1931	3.32107	5.12261	15.7407	38.1143	20.5428	5.48846	0.064945	0.403901	0.008038	2.62834	4	1.36485	0.31181
NG	30	5	14.2194	4.53225	7.39758	21.8821	37.7147	13.317	0.936981	0	0	0	0.442703	14.2194	4.53225	7.39758	21.8821	37.7147	13.317	0.936981	0	0	0	2.69324	11.5905	3.51121	5.53066	17.1698	38.5548	18.9738	3.9834	0.09524	0.581555	0.009069	2.63687	3.63	1.27255	0.375789
NG	26	1	11.7738	3.58243	5.46495	16.44	38.4472	18.9916	4.05877	0.051291	0.870342	0.319619	0.41155	11.7738	3.58243	5.46495	16.44	38.4472	18.9916	4.05877	0.051291	0.870342	0.319619	2.65437	11.4215	3.28482	4.89457	14.5035	36.4221	19.5736	5.58706	0.540624	2.61767	1.15464	2.63316	5.44	1.2973	0.488319
NG	26	2	11.6899	3.58182	5.48961	16.9755	40.2837	19.1897	2.78986	0	0	0	0.423775	11.6899	3.58182	5.48961	16.9755	40.2837	19.1897	2.78986	0	0	0	2.65259	10.9328	3.11347	4.64008	14.5064	39.3037	21.136	4.6661	0.150396	1.26606	0.285029	2.62219	3.93	1.20365	0.367209
NG	26	3	11.4596	3.52582	5.47102	17.1365	40.5512	19.2976	2.55824	0	0	0	0.426402	11.4596	3.52582	5.47102	17.1365	40.5512	19.2976	2.55824	0	0	0	2.64933	10.6507	3.0277	4.56674	14.8028	40.7904	21.8522	4.30948	0	0	0	2.61617	2.88	1.2045	0.288945
NG	26	4	11.4829	3.51625	5.47315	17.1398	40.2013	19.412	2.77468	0	0	0	0.425494	11.4829	3.51625	5.47315	17.1398	40.2013	19.412	2.77468	0	0	0	2.64959	10.6166	3.09448	4.74731	15.4326	40.8769	21.3432	3.88889	0	0	0	2.61704	2.51	1.3489	0.346375
NG	26	5	12.819	3.96627	6.28547	18.9914	39.0383	16.6529	2.24677	0	0	0	0.432889	12.819	3.96627	6.28547	18.9914	39.0383	16.6529	2.24677	0	0	0	2.67139	10.5893	3.16926	4.95834	16.075	40.5885	20.5769	4.04272	0	0	0	2.61819	2.57	1.37825	0.368128
NG	26	1	9.93889	2.96826	4.30048	12.5469	39.3263	24.8584	6.06077	0	0	0	0.396774	9.93889	2.96826	4.30048	12.5469	39.3263	24.8584	6.06077	0	0	0	2.61838	9.15944	2.5851	3.68079	10.839	37.5709	25.5461	7.45496	0.222124	2.09389	0.847722	2.58655	2.6	1.27035	0.533986
NG	26	2	9.60541	2.90913	4.27853	12.7676	39.9926	25.0363	5.41051	0	0	0	0.397578	9.60541	2.90913	4.27853	12.7676	39.9926	25.0363	5.41051	0	0	0	2.61291	8.76166	2.57816	3.75889	11.5889	40.312	26.4966	6.50377	0	0	0	2.5777	4.35	1.2248	0.4213
NG	26	3	10.2069	3.06683	4.55607	13.5004	39.6162	23.919	5.13451	0	0	0	0.402811	10.2069	3.06683	4.55607	13.5004	39.6162	23.919	5.13451	0	0	0	2.62444	9.40671	2.72769	3.97556	11.9384	39.7516	26.0754	6.1246	0	0	0	2.59084	3.14	1.27635	0.434963
NG	26	4	9.75149	2.94169	4.29963	12.7171	40.1453	25.1505	4.99424	0	0	0	0.400735	9.75149	2.94169	4.29963	12.7171	40.1453	25.1505	4.99424	0	0	0	2.61538	8.66005	2.49472	3.60903	11.1428	40.4433	27.3948	6.25536	0	0	0	2.57424	2.45	1.34775	0.365625
NG	26	5	9.66015	2.87829	4.23435	12.6572	39.9514	25.1485	5.47006	0	0	0	0.399409	9.66015	2.87829	4.23435	12.6572	39.9514	25.1485	5.47006	0	0	0	2.61332	8.41915	2.43988	3.57362	11.2223	40.5861	27.3631	6.39586	0	0	0	2.56937	2.11	1.3792	0.239767
NG	26	1	10.6243	3.37413	5.33782	17.2385	40.8507	19.1307	3.44388	0	0	0	0.422273	10.6243	3.37413	5.33782	17.2385	40.8507	19.1307	3.44388	0	0	0	2.63705	10.8217	3.13489	4.68331	14.5724	37.724	19.7653	4.87206	0.329109	2.49831	1.59888	2.62365	5.22	1.08795	0.837201
NG	26	2	12.7003	3.95084	6.37392	19.8057	39.5151	15.6962	1.95793	0	0	0	0.435824	12.7003	3.95084	6.37392	19.8057	39.5151	15.6962	1.95793	0	0	0	2.67058	9.3683	2.9362	4.7159	15.9542	40.9061	21.2437	4.86606	0.009498	0	0	2.59719	3.85	1.1773	0.623273
NG	26	3	13.1501	4.23979	6.90612	20.889	38.5975	14.7279	1.48958	0	0	0	0.440246	13.1501	4.23979	6.90612	20.889	38.5975	14.7279	1.48958	0	0	0	2.67885	10.2075	3.1777	5.06126	16.3871	39.9439	20.5753	4.64719	0	0	0	2.61318	3.13	1.1909	0.470897
NG	26	4	13.8069	4.36435	7.00883	20.5393	38.1144	14.7799	1.38634	0	0	0	0.438772	13.8069	4.36435	7.00883	20.5393	38.1144	14.7799	1.38634	0	0	0	2.68668	12.5979	3.64847	5.57474	16.7293	38.5413	18.9859	3.92229	0	0	0	2.64983	2.9	1.25595	0.346056
NG	26	5	12.5006	4.08747	6.73385	20.6582	39.4343	15.4035	1.18207	0	0	0	0.44162	12.5006	4.08747	6.73385	20.6582	39.4343	15.4035	1.18207	0	0	0	2.67011	9.8823	3.10408	4.98814	16.4635	40.9436	20.5996	4.0188	0	0	0	2.60756	2.53	1.35715	0.30579
NG	18	1	12.6619	3.80212	5.78171	17.0194	38.5472	18.7449	3.44275	0	0	0	0.416435	12.6619	3.80212	5.78171	17.0194	38.5472	18.7449	3.44275	0	0	0	2.66649	10.7381	3.1658	4.79427	14.4103	36.1473	19.6888	5.60601	0.564644	3.42427	1.46044	2.62355	5.45	1.10385	0.832098
NG	18	2	13.9118	4.06784	6.148	17.8288	38.2179	17.2318	2.59385	0	0	0	0.42276	13.9118	4.06784	6.148	17.8288	38.2179	17.2318	2.59385	0	0	0	2.68322	11.3547	3.30788	4.97201	15.1949	39.3097	21.2913	4.56949	0	0	0	2.62927	4.79	1.11985	0.742638
NG	18	3	12.7859	3.848	5.95132	17.5968	38.9694	18.3937	2.45481	0	0	0	0.424749	12.7859	3.848	5.95132	17.5968	38.9694	18.3937	2.45481	0	0	0	2.66883	10.7295	3.18542	4.8784	15.1232	39.6611	21.7255	4.69679	0	0	0	2.61946	3.68	1.22095	0.534338
NG	18	4	12.8863	3.88721	5.96729	17.5458	38.868	18.4094	2.4359	0	0	0	0.425211	12.8863	3.88721	5.96729	17.5458	38.868	18.4094	2.4359	0	0	0	2.67021	10.0588	2.9343	4.45375	13.8478	39.6184	23.6132	5.46894	0.004925	0	0	2.60571	3.11	1.3658	0.436989
NG	18	5	11.8888	3.52778	5.28165	15.2125	38.8813	21.3944	3.81355	0	0	0	0.412663	11.8888	3.52778	5.28165	15.2125	38.8813	21.3944	3.81355	0	0	0	2.65318	10.7889	3.03974	4.47069	13.2972	39.446	23.8653	5.09218	0	0	0	2.61688	2.61		0.388535
NG	18	1	12.1308	3.77043	5.84832	17.7133	39.1707	18.085	3.28146	0	0	0	0.418651	12.1308	3.77043	5.84832	17.7133	39.1707	18.085	3.28146	0	0	0	2.66051	10.0455	3.10543	4.78624	14.8013	36.6947	19.8389	6.13366	0.65631	2.97612	0.961843	2.61227	6.18	1.19905	0.573723
NG	18	2	11.9658	3.60663	5.43828	15.9695	39.2114	20.5846	3.22384	0	0	0	0.41627	11.9658	3.60663	5.43828	15.9695	39.2114	20.5846	3.22384	0	0	0	2.65544	10.3436	2.99878	4.46909	13.6927	38.0074	21.7098	5.46758	0.20649	1.55443	1.55001	2.61366	3.82	1.321	0.459643
NG	18	3	11.1841	3.39055	5.19895	15.7012	39.4477	20.9502	4.12726	0	0	0	0.41548	11.1841	3.39055	5.19895	15.7012	39.4477	20.9502	4.12726	0	0	0	2.6434	10.9501	3.03398	4.47217	13.4161	38.9725	23.3993	5.75139	0.00447	0	0	2.61932	2.7	1.3042	0.360002
NG	18	4	10.2609	3.06777	4.58261	13.902	40.3442	23.4377	4.40474	0	0	0	0.408336	10.2609	3.06777	4.58261	13.902	40.3442	23.4377	4.40474	0	0	0	2.62557	9.27987	2.66359	3.90328	12.1066	40.6635	26.0645	5.31862	0	0	0	2.58809	2.2	1.38705	0.269805
NG	18	5	10.3735	3.19101	4.77132	13.6914	39.1552	24.0212	4.79637	0	0	0	0.404144	10.3735	3.19101	4.77132	13.6914	39.1552	24.0212	4.79637	0	0	0	2.62837	10.6408	2.92994	4.21699	11.9905	38.5927	25.4955	6.13357	0	0	0	2.61228	2.07	1.40325	0.269201
NG	18	1	11.0511	3.4402	5.37763	17.0218	40.3614	19.2802	3.4677	0	0	0	0.419576	11.0511	3.4402	5.37763	17.0218	40.3614	19.2802	3.4677	0	0	0	2.64322	8.75795	2.64871	4.10367	13.7472	37.8647	20.9212	5.983	0.592006	3.4976	1.88401	2.58658	5.46	1.25015	0.497124
NG	18	2	13.0511	4.12499	6.62505	20.1686	38.8693	15.1426	2.01837	0	0	0	0.436734	13.0511	4.12499	6.62505	20.1686	38.8693	15.1426	2.01837	0	0	0	2.67625	11.3116	3.28767	5.07808	16.2391	39.6459	19.9353	4.49142	0.010822	0	0	2.62957	3.65	1.28495	0.344681
NG	18	3	13.9803	4.35906	6.99517	20.5405	38.2183	14.8233	1.08342	0	0	0	0.438889	13.9803	4.35906	6.99517	20.5405	38.2183	14.8233	1.08342	0	0	0	2.68844	12.3775	3.63048	5.64681	17.5889	39.2068	18.1759	3.37366	0	0	0	2.64767	3.09	1.30065	0.242023
NG	18	4	14.6149	4.48289	7.1664	20.7354	37.6588	14.3363	1.00547	0	0	0	0.438976	14.6149	4.48289	7.1664	20.7354	37.6588	14.3363	1.00547	0	0	0	2.69606	12.6254	3.7231	5.72656	17.3886	38.9998	18.4994	3.03719	0	0	0	2.65127	3.02	1.32105	0.228369
NG	18	5	14.4723	4.53485	7.27935	20.7996	37.649	14.3162	0.948709	0	0	0	0.439632	14.4723	4.53485	7.27935	20.7996	37.649	14.3162	0.948709	0	0	0	2.69508	10.0839	3.05139	4.78929	14.9803	37.5708	21.7173	6.78125	0.226716	0.785974	0.013227	2.60956	3.02	1.3609	0.214773
NG	2	1	14.1013	4.11064	6.30499	18.3926	37.9611	16.4179	2.71155	0	0	0	0.424963	14.1013	4.11064	6.30499	18.3926	37.9611	16.4179	2.71155	0	0	0	2.68613	11.5254	3.25871	4.88884	14.6842	33.8722	16.9697	5.34574	0.846029	4.13953	4.46971	2.64022	4.65	1.3576	0.592822
NG	2	2	14.8238	4.39963	6.75594	19.0983	37.1883	14.9372	2.51519	0.198538	0.083129	0	0.42942	14.8238	4.39963	6.75594	19.0983	37.1883	14.9372	2.51519	0.198538	0.083129	0	2.69645	11.6089	3.41928	5.19834	16.1381	38.0186	18.2156	4.03598	0.354628	2.63564	0.374803	2.63724	3.7	1.29565	0.417234
NG	2	3	15.1732	4.28485	6.49971	18.3078	37.3282	16.1526	2.25363	0	0	0	0.426928	15.1732	4.28485	6.49971	18.3078	37.3282	16.1526	2.25363	0	0	0	2.69833	12.7209	3.55938	5.2775	15.8741	38.5278	19.3469	3.98098	0.059832	0.641756	0.01082	2.65011	3.01	1.3742	0.35287
NG	2	4	15.5046	4.56523	7.00293	19.7336	37.5345	14.6265	1.03263	0	0	0	0.435747	15.5046	4.56523	7.00293	19.7336	37.5345	14.6265	1.03263	0	0	0	2.70448	13.4192	3.61352	5.38396	16.1114	38.5639	19.2687	3.63929	0	0	0	2.65859	2.68	1.3214	0.357077
NG	2	5	15.6803	4.67705	7.22746	20.1631	36.8685	13.8077	1.46779	0.075601	0.032427	0	0.435942	15.6803	4.67705	7.22746	20.1631	36.8685	13.8077	1.46779	0.075601	0.032427	0	2.7074	13.8876	3.88082	5.83293	17.2514	37.9981	17.7813	3.36788	0	0	0	2.66707	2.88	1.30595	0.292975
NG	9	1	12.4997	3.75219	5.78176	16.3603	38.1971	20.1589	3.25007	0	0	0	0.416322	12.4997	3.75219	5.78176	16.3603	38.1971	20.1589	3.25007	0	0	0	2.66382	10.4549	3.14702	4.72265	13.3053	35.465	21.7034	6.74319	0.625482	3.26991	0.563184	2.6171	3.61	1.2101	0.613272
NG	9	2	12.8705	3.81456	5.80315	15.6787	37.2659	20.883	3.68414	0	0	0	0.411977	12.8705	3.81456	5.80315	15.6787	37.2659	20.883	3.68414	0	0	0	2.66818	10.3736	3.00366	4.44642	12.6455	37.132	23.7803	6.66582	0.20442	1.56938	0.178873	2.61159	2.43	1.28415	0.500568
NG	9	3	11.4987	3.40623	4.99866	13.2657	38.0691	24.0553	4.70629	0	0	0	0.40051	11.4987	3.40623	4.99866	13.2657	38.0691	24.0553	4.70629	0	0	0	2.64542	11.1476	3.10962	4.37843	11.489	37.6868	26.0764	6.11211	0	0	0	2.62081	1.84	1.2254	0.516721
NG	9	4	13.0481	3.74554	5.44219	13.5948	36.1569	22.8965	5.11584	0	0	0	0.398103	13.0481	3.74554	5.44219	13.5948	36.1569	22.8965	5.11584	0	0	0	2.6678	12.6237	3.39166	4.7285	11.791	35.9404	24.987	6.53456	0.003162	0	0	2.64334	1.77	1.2853	0.389554
NG	9	5	10.4931	2.97267	4.18357	11.4541	39.397	26.3017	5.19787	0	0	0	0.393046	10.4931	2.97267	4.18357	11.4541	39.397	26.3017	5.19787	0	0	0	2.62526	9.77038	2.67093	3.6638	10.0208	39.4771	28.3647	6.03237	0	0	0	2.59358	1.65	1.3087	0.302361
NG	9	1	10.536	3.36991	5.47158	17.8107	41.0405	18.7518	3.01952	0	0	0	0.42693	10.536	3.36991	5.47158	17.8107	41.0405	18.7518	3.01952	0	0	0	2.63646	7.96097	2.56174	4.10212	13.6002	36.6662	21.2414	7.51903	1.06243	4.24279	1.04308	2.57107	4.61	1.1926	0.656726
NG	9	2	11.5554	3.64759	5.92547	18.7094	40.3813	17.5699	2.21091	0	0	0	0.432053	11.5554	3.64759	5.92547	18.7094	40.3813	17.5699	2.21091	0	0	0	2.65331	9.20091	2.89501	4.64097	15.4448	39.2772	20.3603	5.11209	0.362659	2.30519	0.400799	2.59599	3.89	1.11545	0.469914
NG	9	3	13.3131	4.0836	6.49184	19.2722	39.1943	16.3222	1.32276	0	0	0	0.435282	13.3131	4.0836	6.49184	19.2722	39.1943	16.3222	1.32276	0	0	0	2.67813	10.487	3.08104	4.73626	15.0697	39.2954	21.254	5.13301	0.074427	0.782797	0.086384	2.6156	2.94	1.3867	0.28503
NG	9	4	12.9011	4.07502	6.57918	19.6592	38.8544	15.8903	2.04089	0	0	0	0.435858	12.9011	4.07502	6.57918	19.6592	38.8544	15.8903	2.04089	0	0	0	2.67389	10.4406	3.20623	5.03992	16.0457	40.1203	20.8323	4.3149	0	0	0	2.61649	2.66	1.4176	0.257313
NG	9	5	13.4823	4.1272	6.5753	19.5512	38.8826	15.7595	1.6219	0	0	0	0.436089	13.4823	4.1272	6.5753	19.5512	38.8826	15.7595	1.6219	0	0	0	2.6806	10.7447	3.12233	4.80456	15.1745	38.4358	20.4898	5.30878	0.266663	1.59848	0.054421	2.62057	2.53		0.229755
NG	9	1	11.8597	3.57885	5.60395	17.6694	40.2421	18.2304	2.81555	0	0	0	0.422776	11.8597	3.57885	5.60395	17.6694	40.2421	18.2304	2.81555	0	0	0	2.65544	9.57005	2.76886	4.15912	12.9567	33.4602	18.7772	7.13037	1.15349	4.63182	5.39218	2.60664	5.56	1.23285	0.797917
NG	9	2	12.469	3.86332	6.17613	18.923	39.3235	16.6905	2.55457	0	0	0	0.430241	12.469	3.86332	6.17613	18.923	39.3235	16.6905	2.55457	0	0	0	2.6665	9.48816	2.86653	4.49769	14.8253	38.3361	20.5556	5.85633	0.562841	2.66711	0.344328	2.59992	4.34	1.25825	0.511658
NG	9	3	14.1278	4.29441	6.75458	19.5282	37.9405	15.4529	1.9016	0	0	0	0.433033	14.1278	4.29441	6.75458	19.5282	37.9405	15.4529	1.9016	0	0	0	2.68876	10.1147	2.97375	4.59052	14.4793	37.6943	21.5151	6.34118	0.339403	1.7789	0.17282	2.60953	3.55	1.3252	0.346111
NG	9	4	14.8388	4.61597	7.27537	20.4386	37.2417	14.4716	1.11805	0	0	0	0.437253	14.8388	4.61597	7.27537	20.4386	37.2417	14.4716	1.11805	0	0	0	2.69899	12.3361	3.6571	5.56795	16.2094	36.3099	18.8469	5.20422	0.301324	1.55619	0.01089	2.64772	3.24	1.2722	0.344581
NG	9	5	14.9082	4.60237	7.29201	20.4091	37.103	14.6025	1.08291	0	0	0	0.437426	14.9082	4.60237	7.29201	20.4091	37.103	14.6025	1.08291	0	0	0	2.69963	10.44	3.17247	4.89501	15.0823	38.6742	21.694	5.51276	0.086137	0.43705	0.006081	2.61563	2.64	1.30545	0.295931
NG	9	1	12.5935	3.76807	5.90791	17.6147	38.981	18.5166	2.61826	0	0	0	0.422215	12.5935	3.76807	5.90791	17.6147	38.981	18.5166	2.61826	0	0	0	2.66606	10.1407	3.04648	4.61579	13.5174	35.0878	21.1588	7.94959	1.04924	3.2444	0.189775	2.61138	4.79	1.1875	0.498824
NG	9	2	13.7895	4.03369	6.21985	17.1833	36.9682	18.5958	3.20966	0	0	0	0.417881	13.7895	4.03369	6.21985	17.1833	36.9682	18.5958	3.20966	0	0	0	2.6815	9.24444	2.72154	4.12416	12.5625	36.4856	23.3969	8.08666	0.705678	2.50992	0.162566	2.59173	3.77	1.3801	0.377845
NG	9	3	15.2278	4.3582	6.75314	18.0351	35.6218	17.1503	2.85372	0	0	0	0.420854	15.2278	4.3582	6.75314	18.0351	35.6218	17.1503	2.85372	0	0	0	2.69955	11.5381	3.20383	4.77714	13.6237	36.1695	21.9779	6.06669	0.268119	2.22777	0.147177	2.63157	3.12	1.2666	0.304489
NG	9	4	18.0774	4.99808	7.75193	19.7718	33.3292	14.2646	1.80697	0	0	0	0.426535	18.0774	4.99808	7.75193	19.7718	33.3292	14.2646	1.80697	0	0	0	2.73092	11.5521	3.15624	4.71989	12.7205	33.1563	23.371	9.10655	0.502768	1.54198	0.172683	2.63046	2.96	1.2414	0.244002
NG	9	5	16.802	4.74745	7.23031	18.2413	34.1057	16.2954	2.57789	0	0	0	0.420647	16.802	4.74745	7.23031	18.2413	34.1057	16.2954	2.57789	0	0	0	2.71715	11.991	3.32251	4.88712	12.8662	33.5877	22.2437	7.56309	0.588243	2.70163	0.248798	2.6388	2.61	1.227	0.293904
NG	9	1	11.7934	3.62614	5.72416	17.6623	40.1401	18.4223	2.6316	0	0	0	0.424659	11.7934	3.62614	5.72416	17.6623	40.1401	18.4223	2.6316	0	0	0	2.65513	9.41967	2.82518	4.29715	13.6511	37.5927	21.446	6.84917	0.840006	2.93045	0.148607	2.59714	4.95	1.32325	0.375565
NG	9	2	12.6943	3.91565	6.1971	18.4765	38.2407	16.2657	1.86858	0.005539	0.896246	1.43965	0.425533	12.6943	3.91565	6.1971	18.4765	38.2407	16.2657	1.86858	0.005539	0.896246	1.43965	2.67149	10.9806	3.2326	4.89992	14.9664	38.1033	20.1588	4.82228	0.318097	2.28163	0.236352	2.62549	4.18	1.2514	0.31677
NG	9	3	13.3873	4.06039	6.40873	18.9785	38.9592	16.6119	1.59404	0	0	0	0.432775	13.3873	4.06039	6.40873	18.9785	38.9592	16.6119	1.59404	0	0	0	2.67852	11.2009	3.24715	4.94706	15.3216	39.4394	21.207	4.63686	0	0	0	2.62681	3.25	1.38415	0.206245
NG	9	4	14.5381	4.47801	7.01854	19.8344	37.7233	15.1563	1.25141	0	0	0	0.436072	14.5381	4.47801	7.01854	19.8344	37.7233	15.1563	1.25141	0	0	0	2.69452	11.6386	3.39754	5.15382	15.07	36.9555	20.4997	5.42331	0.226442	1.6212	0.014035	2.63544	2.68	1.369	0.176242
NG	9	5	14.3102	4.4649	7.01269	19.6081	37.2781	15.3654	1.96052	0	0	0	0.433761	14.3102	4.4649	7.01269	19.6081	37.2781	15.3654	1.96052	0	0	0	2.69203	12.634	3.67337	5.51907	15.8179	37.6749	20.2184	4.46234	0	0	0	2.64972	2.57	1.36975	0.170293
NG	9	1	11.9266	3.56304	5.48283	16.9349	40.377	18.829	2.88661	0	0	0	0.423318	11.9266	3.56304	5.48283	16.9349	40.377	18.829	2.88661	0	0	0	2.65545	9.45075	2.78944	4.17542	13.2584	37.1437	21.2348	6.69901	0.73772	3.43411	1.07665	2.59822	4.29	1.1618	0.489871
NG	9	2	13.2328	3.95705	6.16374	18.2785	39.1177	17.0587	2.19149	0	0	0	0.429935	13.2328	3.95705	6.16374	18.2785	39.1177	17.0587	2.19149	0	0	0	2.67541	9.78464	2.90962	4.42085	13.9821	37.9872	20.7479	5.41422	0.609853	3.58068	0.562913	2.60506	3	1.08165	0.397972
NG	9	3	13.658	4.01799	6.18813	17.9206	38.4472	17.1238	2.64432	0	0	0	0.427099	13.658	4.01799	6.18813	17.9206	38.4472	17.1238	2.64432	0	0	0	2.68035	10.2152	2.9685	4.44844	13.906	38.1799	21.4284	5.74544	0.433718	2.51587	0.158618	2.61073	2.7	1.21365	0.328853
NG	9	4	14.3245	4.34422	6.80731	19.275	37.8168	15.9431	1.48896	0	0	0	0.433558	14.3245	4.34422	6.80731	19.275	37.8168	15.9431	1.48896	0	0	0	2.69098	10.7359	3.20714	4.89199	15.1049	39.6915	21.9814	4.38725	0	0	0	2.61968	2.35	1.30455	0.269831
NG	9	5	17.4876	5.04767	7.82389	20.2544	34.0736	13.7454	1.5675	0	0	0	0.43151	17.4876	5.04767	7.82389	20.2544	34.0736	13.7454	1.5675	0	0	0	2.72641	11.6287	3.32353	5.02254	13.9172	34.15	21.8314	7.68177	0.447813	1.87109	0.125946	2.63429	2.33	1.25965	0.256698
OL	20	1	13.2309	3.73745	5.40632	14.8786	38.1458	21.1451	3.45584	0	0	0	0.404194	13.2309	3.73745	5.40632	14.8786	38.1458	21.1451	3.45584	0	0	0	2.67054	11.7174	3.1869	4.4512	12.6252	38.7222	23.7827	5.34542	0.122187	0.046818	0	2.63029	5.87	1.06695	1.02038
OL	20	2	15.6872	4.90383	7.78526	21.8612	35.6479	12.0492	1.79431	0.185444	0.085583	0	0.438329	15.6872	4.90383	7.78526	21.8612	35.6479	12.0492	1.79431	0.185444	0.085583	0	2.7104	14.2751	4.06093	6.13802	17.6366	34.3207	15.5904	4.68035	0.619445	2.50488	0.173568	2.67567	4.06	1.21995	0.671706
OL	20	3	16.8583	5.07236	7.99093	22.0438	35.1814	11.6574	1.07541	0.080698	0.039744	0	0.439851	16.8583	5.07236	7.99093	22.0438	35.1814	11.6574	1.07541	0.080698	0.039744	0	2.72217	14.9522	4.2598	6.41383	17.9078	34.0386	15.5902	4.88199	0.49512	1.40218	0.058213	2.68354	3.6	1.28195	0.501342
OL	20	4	18.2475	5.35653	8.41961	22.8199	34.264	10.4589	0.433563	0	0	0	0.442905	18.2475	5.35653	8.41961	22.8199	34.264	10.4589	0.433563	0	0	0	2.73614	16.2208	4.36471	6.5047	17.877	32.307	14.4847	5.31642	0.792044	2.12027	0.012331	2.69757	3.08	1.3822	0.472276
OL	20	5	15.2746	4.68602	7.52994	21.9887	37.2514	12.6494	0.619886	0	0	0	0.44411	15.2746	4.68602	7.52994	21.9887	37.2514	12.6494	0.619886	0	0	0	2.70484	11.9871	3.50503	5.43723	16.7559	36.5515	18.2589	6.40883	0.735473	0.359929	0	2.64182	2.61	1.4449	0.343307
OL	20	1	13.1821	4.03837	6.13422	18.1006	38.6075	17.1319	2.6842	0.084124	0.036993	0	0.424123	13.1821	4.03837	6.13422	18.1006	38.6075	17.1319	2.6842	0.084124	0.036993	0	2.67519	11.8254	3.54535	5.28814	15.8671	36.9085	18.2943	4.96828	0.699168	2.48485	0.118943	2.64067	5	1.3795	0.846472
OL	20	2	13.4926	4.02068	6.12426	17.9257	38.3694	17.4108	2.65658	0	0	0	0.424444	13.4926	4.02068	6.12426	17.9257	38.3694	17.4108	2.65658	0	0	0	2.67839	11.7113	3.36116	5.00789	15.3265	37.8187	19.7787	4.82138	0.281916	1.87841	0.013961	2.63618	4.2	1.3556	0.54387
OL	20	3	13.8472	4.27734	6.64102	19.2364	38.1371	16.092	1.76897	0	0	0	0.432551	13.8472	4.27734	6.64102	19.2364	38.1371	16.092	1.76897	0	0	0	2.68528	11.6304	3.43858	5.18027	15.3712	36.6917	19.7154	6.58809	0.825641	0.558826	0	2.6354	3.26	1.4076	0.440153
OL	20	4	13.0558	4.04628	6.27048	18.4437	38.9478	17.2276	2.00844	0	0	0	0.430613	13.0558	4.04628	6.27048	18.4437	38.9478	17.2276	2.00844	0	0	0	2.67415	12.2693	3.50283	5.22761	15.7828	38.3291	19.4881	4.83353	0.346185	0.220571	0	2.64385	2.93	1.314	0.303062
OL	20	5	11.0664	3.3455	5.13822	16.3121	40.7544	20.4362	2.94724	0	0	0	0.422571	11.0664	3.3455	5.13822	16.3121	40.7544	20.4362	2.94724	0	0	0	2.64172	10.7957	3.09601	4.63094	14.7889	40.2656	21.3495	4.77197	0.216629	0.084771	0	2.61909	2.38	1.35825	0.316748
OL	20	1	11.6386	3.6015	5.49482	16.7712	39.6071	19.5544	3.33241	0	0	0	0.418511	11.6386	3.6015	5.49482	16.7712	39.6071	19.5544	3.33241	0	0	0	2.65196	10.901	3.25908	4.87547	15.0445	37.9009	19.968	4.89412	0.299628	2.57261	0.284721	2.62482	4.96	1.20935	0.963378
OL	20	2	11.4549	3.46867	5.25106	16.2704	40.4092	20.2745	2.87125	0	0	0	0.420507	11.4549	3.46867	5.25106	16.2704	40.4092	20.2745	2.87125	0	0	0	2.64785	11.5355	3.32718	4.89768	15.1999	39.5036	20.1767	4.70302	0.37285	0.283511	0	2.63206	3.78	1.2592	0.689158
OL	20	3	11.4659	3.44406	5.20643	16.1788	40.5854	20.3367	2.78281	0	0	0	0.421808	11.4659	3.44406	5.20643	16.1788	40.5854	20.3367	2.78281	0	0	0	2.64767	11.1908	3.17931	4.71675	14.8628	40.2145	21.8058	4.03004	0	0	0	2.62525	2.82	1.4297	0.584348
OL	20	4	11.9966	3.63032	5.5403	16.8121	39.9629	19.4604	2.59737	0	0	0	0.424245	11.9966	3.63032	5.5403	16.8121	39.9629	19.4604	2.59737	0	0	0	2.65671	11.1511	3.20131	4.76892	15.076	40.1394	21.299	4.17477	0.139063	0.05043	0	2.62525	2.56	1.397	0.403475
OL	20	5	10.9578	3.32024	5.026	15.5549	40.6122	21.3918	3.13708	0	0	0	0.4187	10.9578	3.32024	5.026	15.5549	40.6122	21.3918	3.13708	0	0	0	2.63929	10.0448	2.91077	4.318	13.817	40.2641	22.7263	5.48765	0.273083	0.158277	0	2.60517	2.3	1.31905	0.431587
NG	15	1	13.8621	4.30564	6.71633	19.3668	37.4543	15.8949	2.40001	0	0	0	0.423223	13.8621	4.30564	6.71633	19.3668	37.4543	15.8949	2.40001	0	0	0	2.68585	11.6342	3.5129	5.38331	16.0466	35.8709	18.2323	5.96445	0.925288	2.25229	0.177768	2.63839	6.38	1.06205	1.13589
NG	15	2	14.3092	4.39522	6.88049	19.92	37.1514	14.6089	2.48559	0.169895	0.079248	0	0.430748	14.3092	4.39522	6.88049	19.92	37.1514	14.6089	2.48559	0.169895	0.079248	0	2.69179	12.7002	3.69324	5.62738	16.7351	36.4541	17.7096	4.93768	0.60013	1.52506	0.017523	2.65299	4.54	1.2572	0.623057
NG	15	3	14.8422	4.59023	7.28942	20.9332	36.8404	13.7564	1.7481	0	0	0	0.436178	14.8422	4.59023	7.28942	20.9332	36.8404	13.7564	1.7481	0	0	0	2.69926	11.7169	3.48993	5.44464	16.3586	35.6225	18.6101	5.76821	0.483057	2.27033	0.235887	2.63956	4.1	1.3382	0.734912
NG	15	4	15.3828	4.94016	7.95955	22.2933	35.7771	12.2883	1.26843	0.063101	0.027195	0	0.441189	15.3828	4.94016	7.95955	22.2933	35.7771	12.2883	1.26843	0.063101	0.027195	0	2.70801	11.9827	3.61121	5.69013	16.9272	35.3204	18.6293	6.36113	0.402557	1.05869	0.016731	2.64349	3.74	1.3879	0.502919
NG	15	5	15.683	5.0353	8.15577	22.6653	35.3873	11.7743	1.18994	0.077432	0.031566	0	0.441923	15.683	5.0353	8.15577	22.6653	35.3873	11.7743	1.18994	0.077432	0.031566	0	2.7118	11.7286	3.71116	5.93377	17.3735	34.3881	17.9333	6.80566	0.650604	1.4601	0.015199	2.64212	3.87	1.4435	0.352455
WL	37	1	8.81139	2.6931	3.86533	11.7001	39.118	25.5012	7.03295	0.107687	0.882482	0.287863	0.372157	8.81139	2.6931	3.86533	11.7001	39.118	25.5012	7.03295	0.107687	0.882482	0.287863	2.59739	8.56039	2.42077	3.37703	10.342	36.516	24.8418	8.12015	0.796176	4.14431	0.881341	2.57511	8.26	1.11165	0.681644
WL	37	2	9.0451	2.7748	4.03987	12.5008	40.7697	25.5008	5.36891	0	0	0	0.394764	9.0451	2.7748	4.03987	12.5008	40.7697	25.5008	5.36891	0	0	0	2.60202	7.89706	2.36875	3.38054	10.8157	39.3028	26.3017	7.67469	0.283661	1.80038	0.174693	2.55963	5.66	1.22615	0.480716
WL	37	3	8.41874	2.62467	3.90226	12.6056	41.6772	25.8072	4.9643	0	0	0	0.402239	8.41874	2.62467	3.90226	12.6056	41.6772	25.8072	4.9643	0	0	0	2.58981	7.98956	2.35996	3.42517	11.237	40.7777	27.044	7.16303	0.003587	0	0	2.56016	3.25	1.47095	0.420911
WL	37	4	7.96181	2.47383	3.66452	12.0954	42.1959	26.648	4.96054	0	0	0	0.401995	7.96181	2.47383	3.66452	12.0954	42.1959	26.648	4.96054	0	0	0	2.57904	8.00878	2.30986	3.34439	11.3407	41.6975	26.9833	6.31543	0	0	0	2.55981	1.51	1.3785	0.337604
WL	37	5	8.29552	2.55158	3.81359	12.802	42.7151	25.6	4.22221	0	0	0	0.408089	8.29552	2.55158	3.81359	12.802	42.7151	25.6	4.22221	0	0	0	2.58687	8.73027	2.47863	3.54089	11.4329	41.0637	26.531	6.22259	0	0	0	2.57542	1.25	1.41705	0.304084
WL	37	1	8.05526	2.52358	3.68121	12.0743	40.3339	25.0931	6.66256	0.139521	1.42314	0.013395	0.33428	8.05526	2.52358	3.68121	12.0743	40.3339	25.0931	6.66256	0.139521	1.42314	0.013395	2.58248	7.91143	2.29285	3.21383	10.3432	36.1992	23.8877	8.37208	1.01402	4.63295	2.13276	2.5633	13.26	1.26095	0.573402
WL	37	2	8.73245	2.68483	3.99851	13.4463	42.2927	24.3503	4.49489	0	0	0	0.407911	8.73245	2.68483	3.99851	13.4463	42.2927	24.3503	4.49489	0	0	0	2.59673	8.35441	2.49075	3.62045	11.7061	39.5206	24.9853	6.71829	0.292184	2.11298	0.198931	2.57129	3.87	1.3668	0.432348
WL	37	3	7.85567	2.49661	3.88042	13.789	42.9152	24.501	4.562	0	0	0	0.410759	7.85567	2.49661	3.88042	13.789	42.9152	24.501	4.562	0	0	0	2.57949	7.48935	2.30377	3.44914	11.8297	41.2	26.0724	6.67799	0.061536	0.848811	0.06728	2.55111	3.48	1.3922	0.377211
WL	37	4	8.05103	2.57981	4.12919	14.7672	43.3315	23.6373	3.50392	0	0	0	0.419167	8.05103	2.57981	4.12919	14.7672	43.3315	23.6373	3.50392	0	0	0	2.58534	9.1673	2.66277	3.98118	13.4737	41.7502	24.0316	4.93326	0	0	0	2.58761	1.75	1.39565	0.34282
WL	37	5	8.3767	2.67489	4.35357	15.6491	42.8626	22.1449	3.93818	0	0	0	0.422129	8.3767	2.67489	4.35357	15.6491	42.8626	22.1449	3.93818	0	0	0	2.59337	9.3782	2.77044	4.25788	14.5642	41.7632	22.7437	4.52237	0	0	0	2.59365	1.63	1.3393	0.253338
WL	37	1	10.6031	3.41195	5.31275	16.8811	41.1157	19.9103	2.76501	0	0	0	0.413199	10.6031	3.41195	5.31275	16.8811	41.1157	19.9103	2.76501	0	0	0	2.63661	9.27649	2.83745	4.27916	13.7831	37.6685	20.5617	5.99675	0.769076	3.85364	0.974193	2.59663	7.41	1.2287	0.522309
WL	37	2	9.88846	3.22744	5.3488	18.7286	42.7515	18.3204	1.73485	0	0	0	0.436305	9.88846	3.22744	5.3488	18.7286	42.7515	18.3204	1.73485	0	0	0	2.62644	10.1669	2.99204	4.54226	14.9996	39.4889	20.1467	4.7724	0.368854	2.28603	0.236427	2.61109	3.9	1.1924	0.392591
WL	37	3	10.3268	3.4396	5.65078	18.7596	41.6828	17.8074	2.33304	0	0	0	0.435666	10.3268	3.4396	5.65078	18.7596	41.6828	17.8074	2.33304	0	0	0	2.63498	10.6464	3.2339	5.00207	16.0015	39.1977	19.1405	4.09591	0.226612	2.06229	0.393095	2.62169	3.21	1.2564	0.340375
WL	37	4	11.273	3.62986	5.90161	18.7673	40.2934	17.461	2.67383	0	0	0	0.433676	11.273	3.62986	5.90161	18.7673	40.2934	17.461	2.67383	0	0	0	2.64959	11.6064	3.4504	5.2672	16.1671	38.413	18.9245	4.14987	0.137103	1.48356	0.400871	2.63664	2.29	1.4131	0.306472
WL	37	5	10.8919	3.78208	6.2346	19.701	40.718	16.6221	2.05027	0	0	0	0.440021	10.8919	3.78208	6.2346	19.701	40.718	16.6221	2.05027	0	0	0	2.64676	11.7632	3.55586	5.37005	16.3835	39.2389	18.9655	3.67501	0.102275	0.929942	0.015787	2.63878	2.06	1.19135	0.243212
NF	100	1	6.88941	2.38557	3.8297	13.4002	39.6655	23.9419	7.28431	0.397857	1.78542	0.42011	0.298504	6.88941	2.38557	3.8297	13.4002	39.6655	23.9419	7.28431	0.397857	1.78542	0.42011	2.56099	4.86219	1.72155	2.72923	9.14103	30.7215	23.6884	13.303	2.73449	8.55406	2.5446	2.4845	28.03	1.0348	0.590661
NF	100	2	9.86343	3.26531	5.43782	18.0998	41.5484	19.119	2.6663	0	0	0	0.395473	9.86343	3.26531	5.43782	18.0998	41.5484	19.119	2.6663	0	0	0	2.6262	10.3074	3.20368	5.01735	16.0331	40.8479	20.7292	3.8614	0	0	0	2.61441	10.4	1.1145	0.458857
NF	100	3	9.50681	3.12145	4.93283	15.7417	40.131	21.0422	4.29691	0	0.748666	0.478401	0.406041	9.50681	3.12145	4.93283	15.7417	40.131	21.0422	4.29691	0	0.748666	0.478401	2.61807	7.29215	2.33464	3.58762	11.431	34.6561	23.1846	9.06948	1.23257	5.38789	1.82402	2.55403	6.71	1.1057	0.450213
NF	100	4	10.5914	3.35115	5.26772	16.5049	39.9853	19.7325	3.43795	0.005157	0.634291	0.489543	0.419496	10.5914	3.35115	5.26772	16.5049	39.9853	19.7325	3.43795	0.005157	0.634291	0.489543	2.63678	9.08213	2.80834	4.28457	13.4764	37.4837	21.9938	6.3756	0.503864	3.16482	0.826916	2.59209	3.5	1.3309	0.38027
NF	100	5	9.50174	3.29386	5.76327	19.6452	41.8812	18.0423	1.87249	0	0	0	0.439905	9.50174	3.29386	5.76327	19.6452	41.8812	18.0423	1.87249	0	0	0	2.62274	10.0991	3.26608	5.28554	17.0838	40.3299	19.3626	4.13597	0.265734	0.171286	0	2.61346	2.39	1.3034	0.380501
NF	100	1	7.50325	2.6216	4.32199	14.4221	38.1522	22.3379	6.73243	0.279697	1.75323	1.8757	0.299031	7.50325	2.6216	4.32199	14.4221	38.1522	22.3379	6.73243	0.279697	1.75323	1.8757	2.57961	6.42592	2.27627	3.63341	11.2755	30.2995	20.5308	10.7716	2.3933	8.94121	3.45254	2.54041	37.44	1.02745	0.871
NF	100	2	8.69243	2.97077	4.79851	15.9729	41.3247	21.6001	4.6366	0.004061	0	0	0.319912	8.69243	2.97077	4.79851	15.9729	41.3247	21.6001	4.6366	0.004061	0	0	2.60267	7.13955	2.42411	3.80766	12.0176	34.4266	22.6251	9.54587	1.48579	5.14396	1.3837	2.55247	20.98	1.17175	0.658167
NF	100	3	9.25359	3.05246	4.85152	15.7741	40.3991	21.0336	4.33104	0.059454	0.929668	0.315551	0.334465	9.25359	3.05246	4.85152	15.7741	40.3991	21.0336	4.33104	0.059454	0.929668	0.315551	2.6134	7.78225	2.45861	3.7567	11.8151	34.3992	22.3592	9.24052	1.47308	5.06748	1.6478	2.56569	15.69	1.31735	0.41949
NF	100	4	10.1646	3.28496	5.22702	16.7882	41.364	20.3975	2.77372	0	0	0	0.417229	10.1646	3.28496	5.22702	16.7882	41.364	20.3975	2.77372	0	0	0	2.6293	9.7282	2.92479	4.43638	14.0534	38.6349	21.734	5.73251	0.320223	2.14809	0.287564	2.6028	6.5	1.2457	0.262681
NF	100	5	9.87858	3.49919	5.9214	19.0031	41.2268	18.496	1.97501	0	0	0	0.435407	9.87858	3.49919	5.9214	19.0031	41.2268	18.496	1.97501	0	0	0	2.62968	9.32786	3.11062	5.03478	16.4146	40.5339	20.4351	4.09895	0.089652	0.938336	0.016223	2.59976	3.6	1.22315	0.209725
NF	100	1	8.34072	2.8043	4.55031	15.0831	39.2202	21.5801	5.54622	0.153846	1.8383	0.882899	0.308995	8.34072	2.8043	4.55031	15.0831	39.2202	21.5801	5.54622	0.153846	1.8383	0.882899	2.59644	6.25736	2.11748	3.32583	10.4562	31.1599	21.9458	11.4508	2.37034	7.89697	3.01931	2.53116	21.57	1.2408	1.2815
NF	100	2	10.5458	3.34643	5.26666	16.4509	40.0212	20.415	3.95398	0	0	0	0.395852	10.5458	3.34643	5.26666	16.4509	40.0212	20.415	3.95398	0	0	0	2.63508	9.07275	2.83611	4.31449	13.1525	36.6804	22.4389	7.11581	0.671132	3.26053	0.45732	2.5917	9.13	1.16515	0.535972
NF	100	3	10.5849	3.35563	5.25579	16.3366	39.9494	20.45	4.06759	0	0	0	0.401337	10.5849	3.35563	5.25579	16.3366	39.9494	20.45	4.06759	0	0	0	2.63559	8.96963	2.77772	4.21399	12.9838	37.4585	23.4246	7.56595	0.562557	2.02906	0.01423	2.58751	8.29	1.23115	0.495393
NF	100	4	10.0737	3.25277	5.30989	17.1256	39.8238	19.2245	3.76014	0.156837	1.0602	0.212597	0.419489	10.0737	3.25277	5.30989	17.1256	39.8238	19.2245	3.76014	0.156837	1.0602	0.212597	2.62936	9.76649	3.04202	4.73759	14.963	39.7589	21.8443	4.91909	0.128266	0.828895	0.011441	2.60429	4.3	1.28925	0.286328
NF	100	5	9.84244	3.27419	5.30873	17.0749	41.3977	20.1899	2.91227	0	0	0	0.427435	9.84244	3.27419	5.30873	17.0749	41.3977	20.1899	2.91227	0	0	0	2.62493	10.7291	3.26053	5.00936	15.6152	40.4036	21.2621	3.72011	0	0	0	2.62057	2.63		0.272743
NF	100	1	11.3648	3.63822	6.16701	20.3706	40.3677	16.0982	1.99347	0	0	0	0.436384	11.3648	3.63822	6.16701	20.3706	40.3677	16.0982	1.99347	0	0	0	2.65234	9.10201	2.86388	4.65835	14.9959	35.4224	19.2768	7.03339	1.135	4.49418	1.01809	2.59685	4.83	1.20815	0.807994
NF	100	2	11.9329	3.78043	6.26291	19.4024	39.1041	17.2055	2.31187	0	0	0	0.431968	11.9329	3.78043	6.26291	19.4024	39.1041	17.2055	2.31187	0	0	0	2.65996	10.2576	3.08126	4.86623	14.9156	36.2147	20.3757	6.56752	0.693837	2.78157	0.245987	2.61457	3.78	1.2452	0.462279
NF	100	3	11.4473	3.71395	6.36109	20.7067	40.0964	15.8862	1.78833	0	0	0	0.439734	11.4473	3.71395	6.36109	20.7067	40.0964	15.8862	1.78833	0	0	0	2.65444	9.22081	2.91083	4.81418	16.2403	38.8045	19.8535	5.62985	0.540156	1.97515	0.010683	2.5969	3.71	1.2511	0.456604
NF	100	4	12.3701	3.93938	6.54968	20.0523	38.7224	16.3465	2.01966	0	0	0	0.433791	12.3701	3.93938	6.54968	20.0523	38.7224	16.3465	2.01966	0	0	0	2.6671	9.37633	2.90199	4.64512	14.5716	36.0073	20.6412	7.53093	1.01763	3.09033	0.217572	2.59911	4.21	1.1688	0.401644
NF	100	5	11.0478	3.72219	6.42615	20.4546	39.8416	16.734	1.77365	0	0	0	0.439136	11.0478	3.72219	6.42615	20.4546	39.8416	16.734	1.77365	0	0	0	2.64929	10.2461	3.2519	5.2645	16.3004	37.4096	19.2782	5.11143	0.425834	2.48828	0.223769	2.61715	3.04	1.20925	0.344465
NF	100	1	6.67892	2.36219	3.87852	13.8873	40.8074	23.7038	6.32144	0.233814	1.649	0.477603	0.303898	6.67892	2.36219	3.87852	13.8873	40.8074	23.7038	6.32144	0.233814	1.649	0.477603	2.55675	6.73648	2.30461	3.62366	11.4241	32.4787	22.2074	10.9316	1.99196	6.48622	1.81522	2.54335	25.93	0.7948	2.28134
NF	100	2	8.95707	2.97806	4.85282	16.8059	42.2941	20.6414	3.47054	0	0	0	0.385976	8.95707	2.97806	4.85282	16.8059	42.2941	20.6414	3.47054	0	0	0	2.60776	7.78071	2.53654	3.94675	12.6436	35.637	22.6553	8.689	1.07719	4.09092	0.942957	2.56585	10.87	0.87365	0.994962
NF	100	3	9.65319	3.13826	5.13689	17.3458	41.5509	19.8572	3.31774	0	0	0	0.417871	9.65319	3.13826	5.13689	17.3458	41.5509	19.8572	3.31774	0	0	0	2.62095	8.23706	2.62654	4.15097	13.4302	36.3596	22.456	8.6366	1.00225	2.92325	0.177503	2.57469	6.73	1.04695	0.64688
NF	100	4	9.80517	3.21716	5.32732	18.1165	42.069	19.1777	2.28717	0	0	0	0.431612	9.80517	3.21716	5.32732	18.1165	42.069	19.1777	2.28717	0	0	0	2.6247	8.14731	2.58413	4.09569	13.7894	38.9207	22.8114	6.89232	0.510877	2.11845	0.129763	2.57175	3.97	1.2393	0.326506
NF	100	5	10.2118	3.34531	5.54421	18.227	41.2231	19.0344	2.41415	0	0	0	0.431608	10.2118	3.34531	5.54421	18.227	41.2231	19.0344	2.41415	0	0	0	2.6321	10.097	3.14709	5.11753	17.0098	39.715	19.1787	4.21587	0.13487	1.3088	0.075382	2.61302	3.12	1.3484	0.241229
NF	100	1	9.72602	3.11838	5.03357	16.2199	38.1293	19.8265	5.13169	0.161176	1.52934	1.12409	0.310041	9.72602	3.11838	5.03357	16.2199	38.1293	19.8265	5.13169	0.161176	1.52934	1.12409	2.62346	7.1955	2.34044	3.6755	11.0859	27.9306	18.5545	11.0712	2.93919	10.4911	4.71599	2.56151	24.17	0.72145	2.93803
NF	100	2	9.36249	3.0302	4.96279	16.352	38.5662	20.3105	5.89189	0.38225	1.05733	0.084281	0.316277	9.36249	3.0302	4.96279	16.352	38.5662	20.3105	5.89189	0.38225	1.05733	0.084281	2.61575	7.79749	2.50487	3.95933	12.012	29.18	18.3154	10.2375	2.6389	9.68026	3.67427	2.57468	19.49	0.8487	1.84491
NF	100	3	11.5993	3.72542	6.11996	19.5843	39.9182	16.9146	2.13815	0	0	0	0.360284	11.5993	3.72542	6.11996	19.5843	39.9182	16.9146	2.13815	0	0	0	2.65527	7.32064	2.40988	3.88838	12.1842	29.4714	18.2974	10.4167	2.58282	8.54813	4.88045	2.56486	14.36	0.9344	1.48272
NF	100	4	11.371	3.79454	6.4369	20.5332	39.7221	16.0183	2.12393	0	0	0	0.42623	11.371	3.79454	6.4369	20.5332	39.7221	16.0183	2.12393	0	0	0	2.65402	9.72921	3.15638	5.02875	15.325	35.0487	19.0267	7.24449	1.21496	3.93654	0.289263	2.60907	7.39	1.14635	0.590869
NF	100	5	12.7154	4.22732	7.22492	22.0124	38.4759	14.3935	0.950564	0	0	0	0.442703	12.7154	4.22732	7.22492	22.0124	38.4759	14.3935	0.950564	0	0	0	2.67503	12.213	3.81161	6.00124	17.2406	34.8136	16.622	4.94066	0.780525	3.33037	0.246483	2.6506	4.13	1.27285	0.365859
NF	100	1	8.25651	2.69426	4.21028	13.9019	39.6381	22.7847	5.80385	0.170824	1.96511	0.574474	0.308431	8.25651	2.69426	4.21028	13.9019	39.6381	22.7847	5.80385	0.170824	1.96511	0.574474	2.59184	8.13419	2.50872	3.75877	11.8038	34.3787	21.7412	8.60968	1.44911	5.604	2.01189	2.57375	19.48	0.98355	1.85164
NF	100	2	9.45671	3.08852	4.94855	16.1709	41.3384	21.3323	3.66458	0	0	0	0.378524	9.45671	3.08852	4.94855	16.1709	41.3384	21.3323	3.66458	0	0	0	2.61628	9.17104	2.77914	4.23972	13.2532	35.6885	21.0485	7.32843	1.00197	4.47777	1.0117	2.59463	11.17	1.19575	0.801892
NF	100	3	10.718	3.45151	5.57002	17.7856	40.8809	19.1196	2.47438	0	0	0	0.423097	10.718	3.45151	5.57002	17.7856	40.8809	19.1196	2.47438	0	0	0	2.63965	10.3602	3.04302	4.64381	14.1791	36.0594	20.2901	6.13713	0.689727	3.73049	0.866961	2.61618	5.97	1.187	0.750187
NF	100	4	11.2493	3.75782	6.26554	19.9964	40.7096	16.593	1.42832	0	0	0	0.440067	11.2493	3.75782	6.26554	19.9964	40.7096	16.593	1.42832	0	0	0	2.65149	12.0287	3.61892	5.62197	17.091	37.8249	17.6489	3.72709	0.248951	2.05964	0.129937	2.64472	3.09	1.2327	0.4495
NF	100	5	11.8724	4.08945	7.0255	22.0491	39.8376	14.3729	0.753056	0	0	0	0.447953	11.8724	4.08945	7.0255	22.0491	39.8376	14.3729	0.753056	0	0	0	2.66394	11.6561	3.75414	5.96697	17.9781	37.5082	16.6535	3.88364	0.556683	1.93466	0.108128	2.64211	2.58	1.2511	0.27047
NF	100	1	7.50999	2.534	4.07497	14.1114	41.097	23.7766	5.54452	0.005147	0.913613	0.43275	0.30739	7.50999	2.534	4.07497	14.1114	41.097	23.7766	5.54452	0.005147	0.913613	0.43275	2.5754	7.26306	2.34013	3.60584	11.5248	33.7113	22.1908	9.69892	1.65813	6.31568	1.69126	2.5545	24.14	1.2656	0.444562
NF	100	2	9.24652	3.02614	4.94911	16.6614	41.6594	20.7339	3.72359	0	0	0	0.412247	9.24652	3.02614	4.94911	16.6614	41.6594	20.7339	3.72359	0	0	0	2.61292	8.29165	2.62667	4.15208	13.6568	37.7215	22.041	6.61393	0.591471	3.45476	0.850031	2.57682	7.22	1.2013	0.367028
NF	100	3	9.36817	3.05726	5.0516	17.0964	41.9635	20.4723	2.9907	0	0	0	0.424509	9.36817	3.05726	5.0516	17.0964	41.9635	20.4723	2.9907	0	0	0	2.61557	9.32893	2.91334	4.57744	14.9411	39.5233	21.3382	5.25546	0.304309	1.8069	0.011079	2.59676	4.69	1.2088	0.380766
NF	100	4	9.78966	3.19944	5.20219	17.1392	41.7916	20.176	2.70188	0	0	0	0.427994	9.78966	3.19944	5.20219	17.1392	41.7916	20.176	2.70188	0	0	0	2.6234	11.3034	3.32477	5.08015	15.827	40.0062	20.9414	3.517	0	0	0	2.6293	3.03	1.19115	0.201219
NF	100	5	10.0723	3.49084	5.88404	18.9723	41.2976	18.3907	1.89227	0	0	0	0.436056	10.0723	3.49084	5.88404	18.9723	41.2976	18.3907	1.89227	0	0	0	2.63232	11.068	3.48332	5.47851	16.8699	39.744	19.8586	3.49765	0	0	0	2.6288	3.15	1.25695	0.343743
NF	100	1	8.86584	2.86198	4.56518	14.5816	39.4862	23.0266	5.85626	0.057753	0.684445	0.014188	0.357011	8.86584	2.86198	4.56518	14.5816	39.4862	23.0266	5.85626	0.057753	0.684445	0.014188	2.60357	7.12538	2.26716	3.49568	10.8639	33.8262	23.8518	10.4301	1.5154	5.07278	1.55161	2.54858	11.92	0.94335	2.04998
NF	100	2	8.92901	2.83987	4.59536	14.8121	40.6236	23.4696	4.73056	0	0	0	0.401382	8.92901	2.83987	4.59536	14.8121	40.6236	23.4696	4.73056	0	0	0	2.60409	8.06382	2.36906	3.63965	11.5889	36.1579	23.9717	8.07492	0.731939	3.72187	1.68018	2.56819	6.81	1.0164	1.04216
NF	100	3	8.23743	2.68554	4.41535	14.6386	41.3671	24.1552	4.50081	0	0	0	0.41057	8.23743	2.68554	4.41535	14.6386	41.3671	24.1552	4.50081	0	0	0	2.59039	8.07569	2.45414	3.78357	11.9968	38.2165	24.9684	7.04176	0.283841	2.66274	0.516548	2.56743	3.77	1.0219	0.658364
NF	100	4	9.06993	3.01167	4.91341	15.5887	40.6539	22.5592	4.20328	0	0	0	0.416883	9.06993	3.01167	4.91341	15.5887	40.6539	22.5592	4.20328	0	0	0	2.60912	10.258	2.96741	4.45933	13.4932	39.4329	23.9706	5.41861	0	0	0	2.6087	2	1.1199	0.436948
NF	100	5	8.58119	2.93669	4.94177	16.7861	42.2725	21.4394	3.04246	0	0	0	0.427097	8.58119	2.93669	4.94177	16.7861	42.2725	21.4394	3.04246	0	0	0	2.60141	9.6516	2.94033	4.52422	14.43	40.4446	22.82	5.18544	0.003828	0	0	2.60006	2.07	1.2546	0.352161
